# Supplementary material for: Microwave assisted aminocatalyzed [3 + 2] annulation between α-iminonitriles and succinaldehyde: synthesis of pyrrole-3-methanols and related polycyclic ring systems
Source: Royal Society of Chemistry journal article supplement (doi:10.1039/c6ra06831f), 2016-01-01

## Supporting Information

### Microwave assisted aminocatalyzed [3+2] annulation between $\alpha$ - iminonitrile and succinaldehyde: Synthesis of pyrrole-3-methanols and related polycyclic ring systems

Nisar A. Mir,<sup>a</sup> Sachin Choudhary,<sup>a</sup> Panduga Ramaraju,<sup>a</sup> Deepika Singh,<sup>b</sup> and Indresh Kumar<sup>\*a</sup>

<sup>a</sup> Department of Chemistry, Birla Institute of Technology and Science, Pilani 333 031, (Rajasthan) India

E-mail: [indresh.chemistry@gmail.com](mailto:indresh.chemistry@gmail.com), [indresh.kumar@pilani.bits-pilani.ac.in](mailto:indresh.kumar@pilani.bits-pilani.ac.in)

<sup>b</sup> Instrumentation Division, IIM-CSIR Lab, Jammu 180 001, India

#### Table of Contents:

---

|                                                                                  |         |
|----------------------------------------------------------------------------------|---------|
| General Experimental Methods.....                                                | S2      |
| Typical experimental procedure and characterization data for all compounds ..... | S3-S14  |
| Copies of <sup>1</sup> H and <sup>13</sup> C-NMR Spectra for all compounds.....  | S15-S40 |

#### General Experimental Methods:

**General Remarks:** Unless otherwise stated, all reagents were purchased from commercial suppliers and used without further purification. All solvents employed in the reactions were distilled from appropriate drying agents prior to use. All reactions under standard conditions were monitored by thin-layer chromatography (TLC) on Merck silica gel 60 F254 pre-coated plates (0.25 mm). The column chromatography was performed on silica gel (100-200) using mixture of hexane/EtOAc. Chemical yields refer to pure isolated substances.  $^1\text{H-NMR}$  spectra were recorded on a BRUKER-AV400 (400 MHz) spectrometer. Chemical shifts are reported in ppm from tetramethylsilane with the solvent resonance as the internal standard ( $\text{CDCl}_3 = \delta$  7.26 for  $^1\text{H}$ , and 77.00 for  $^{13}\text{C}$  NMR). Data are reported as follows: chemical shift, multiplicity (s = singlet, d = doublet, dd = doublet of doublet, t = triplet, q = quartet, br = broad, m = multiplet), coupling constants (Hz) and integration.  $^{13}\text{C-NMR}$  spectra were recorded on a BRUKER-AV400 (75 MHz) spectrometer with complete proton decoupling. High resolution mass spectra were recorded using quadrupole electrospray ionization (ESI) technique.

**Preparation of succinaldehyde 2 (3M sol):**

To a stirred solution of 2,5-dimethoxytetrahydrofuran (2.0 g, 15.15 mmol) in  $\text{H}_2\text{O}$  (5.0 mL) was added Amberlyst-15 (10 wt %) and further heated at 80 °C for 4 h in an open flask. The resulting solution was cooled to rt and used directly for the said reaction.

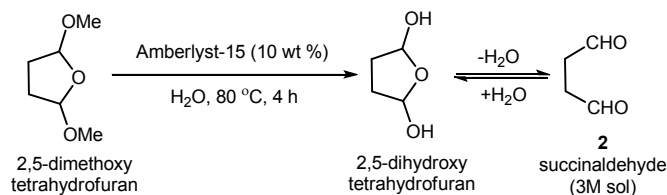

**General experimental procedure for the synthesis of imino-nitriles 5:<sup>[1]</sup>**

To a stirred solution of aldehyde (0.3 mmol) and *p*-anisidine (0.3 mmol, 1.0 equiv) in acetonitrile (0.3 mL, 1.0 M sol) was added TMS-CN (0.33 mmol, 1.1 equiv) at room temperature, and the mixture was stirred for one hour. IBX (0.33 mmol, 1.1 equiv) and *n*-Bu<sub>4</sub>N<sup>+</sup>Br<sup>-</sup> (TBAB, 0.33 mmol, 1.1 equiv) were then added at the same temperature until starting materials consumed completely by TLC. The reaction mixture was then filtered over celite and concentrated under vacuo. The crude product was purified by silica-gel column chromatograph using hexane:AcOEt (99.5:0.5) to afford pure  $\alpha$ -imino-nitrile.

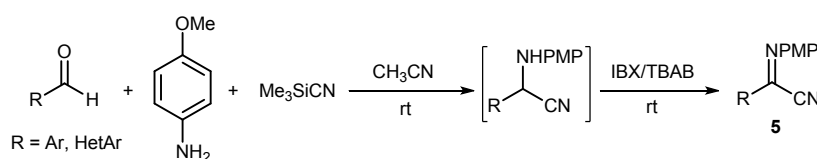

**Scheme 1:** Preparation of imino-nitriles **5** from Ar/HetAr aldehydes

[1] P, Fontaine, A. Chiaroni, G. Masson and J. Zhu; *Org. Lett.*, 2008, **10**, 1509.

### Typical procedure for the synthesis of pyrrole-3-methylenealcohols (**7**)

Succinaldehyde **2** (0.3 mL, 0.9 mmol, 3M solution) was added to a mixture of preformed N-PMP-iminonitrile **5** (0.3 mmol), PhCO<sub>2</sub>H (7.3 mg, 0.06 mmol), and proline **1a** (7.0 mg, 0.06 mmol) in DMSO (3.0 mL) and irradiated under microwave condition at 70 °C until the  $\alpha$ -iminonitrile **5** was consumed as monitored by TLC. Once the imine consumed, reaction was taken to 0 °C and cold MeOH (2.0 mL), CH<sub>3</sub>CO<sub>2</sub>H (100 mol%, 18  $\mu$ L) was added. To this solution NaBH<sub>4</sub> was added cautiously, and stirred for additional 2 h. The reaction was subsequently quenched with aqueous NaHCO<sub>3</sub> (20 % sol, 5.0 mL). The aqueous solution was extracted with EtOAc (2  $\times$  8.0 mL) and combined organic extracts were washed with brine, dried over anhydrous Na<sub>2</sub>SO<sub>4</sub> and concentrated under vacuo after filtration. The residue was purified by silica gel column chromatography eluting with hexane:EtOAc to afford pyrrole-3-methylenealcohols **7** with 50-75% yields.

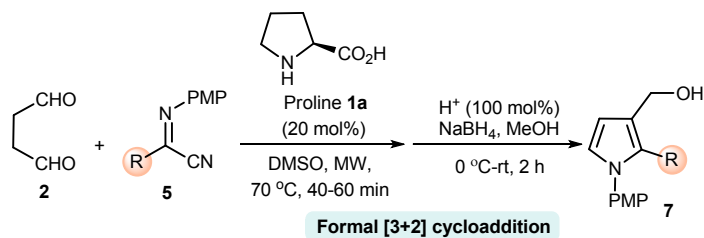

**<sup>1</sup>H and <sup>13</sup>C NMR data for prepared compounds:**

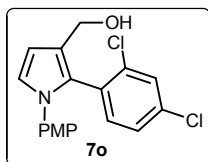

**(1-(4-methoxyphenyl)-2-(2-nitrophenyl)-1H-pyrrol-3-yl) methanol (7a):**

(66 mg, 69% yield); <sup>1</sup>H NMR (400 MHz, CDCl<sub>3</sub>) δ 3.75 (s, 3H), 4.39 (d, *J* = 12.0 Hz, 1H), 4.47 ((d, *J* = 12.0 Hz, 1H), 6.45 (d, *J* = 2.6 Hz, 1H), 6.73 (d, *J* = 8.7 Hz, 2H), 6.90 (d, *J* = 2.6 Hz, 1H), 6.96 (d, *J* = 8.8 Hz, 2H), 7.44 (d, *J* = 7.5 Hz, 2H), 7.56 (t, *J* = 7.5 Hz, 1H), 7.81 (d, *J* = 7.9 Hz, 1H); <sup>13</sup>C NMR (75 MHz, CDCl<sub>3</sub>) δ 55.37, 57.77, 109.50, 114.16 (2C), 123.42, 123.60, 124.34, 126.60, 126.68 (2C), 126.86, 128.82, 132.32, 132.48, 134.08, 149.66, 158.33; HRMS (ESI): Calcd for C<sub>18</sub>H<sub>16</sub>N<sub>2</sub>O<sub>4</sub> (MH<sup>+</sup>) 325.1178; Found 325.1176.

**(1-(4-methoxyphenyl)-2-(3-nitrophenyl)-1H-pyrrol-3-yl) methanol (7b):**

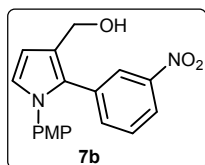

(69 mg, 72% yield); <sup>1</sup>H NMR (400 MHz, CDCl<sub>3</sub>) δ 3.78 (s, 3H), 4.56 (s, 2H), 6.45 (d, *J* = 2.3 Hz, 1H), 6.82 (d, *J* = 8.6 Hz, 2H), 6.90 (d, *J* = 2.2 Hz, 1H), 7.02 (d, *J* = 8.6 Hz, 2H), 7.41 (d, *J* = 7.8 Hz, 1H), 7.49 (d, *J* = 7.6 Hz, 1H), 8.05 (d, *J* = 8.8 Hz, 2H); <sup>13</sup>C NMR (75 MHz, CDCl<sub>3</sub>) δ 55.41, 57.82, 109.94, 114.38 (2C), 121.44, 123.81, 124.26, 124.59, 126.99 (2C), 128.87, 129.35, 132.63, 133.32, 135.79, 147.96, 158.52; HRMS (ESI): Calcd for C<sub>18</sub>H<sub>16</sub>N<sub>2</sub>O<sub>4</sub> (MH<sup>+</sup>) 325.1178; Found 325.1181.

**(1-(4-methoxyphenyl)-2-(4-nitrophenyl)-1H-pyrrol-3-yl) methanol (7c):**

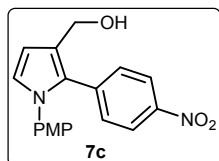

(72 mg, 75% yield);  $^1\text{H-NMR}$  (400 MHz,  $\text{CDCl}_3$ )  $\delta$  3.79 (s, 3H), 4.55 (s, 2H), 6.45 (d,  $J = 2.0$  Hz, 1H), 6.82 (d,  $J = 8.6$  Hz, 2H), 6.92 (d,  $J = 2.1$  Hz, 1H), 7.00 (d,  $J = 8.6$  Hz, 2H), 7.32 (d,  $J = 8.5$  Hz, 2H), 8.07 (d,  $J = 8.5$  Hz, 2H);  $^{13}\text{C NMR}$  (75 MHz,  $\text{CDCl}_3$ )  $\delta$  55.36, 57.69, 110.40, 114.36 (2C), 123.21(2C), 124.60, 124.99, 126.78 (2C), 129.46, 130.12 (2C), 132.67, 138.18, 145.89, 158.47; IR (KBr)/ $\text{cm}^{-1}$ ; HRMS (ESI): Calcd for  $\text{C}_{18}\text{H}_{16}\text{N}_2\text{O}_4$  ( $\text{MH}^+$ ) 325.1178; Found 325.1182.

**(2-(2-chlorophenyl)-1-(4-methoxyphenyl)-1H-pyrrol-3-yl) methanol (7d):**

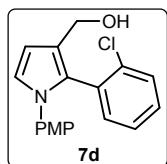

(60 mg, 65% yield);  $^1\text{H-NMR}$  (400 MHz,  $\text{CDCl}_3$ )  $\delta$  3.75 (s, 3H), 4.38 (d,  $J = 12.0$  Hz, 1H), 4.48 (d,  $J = 12.0$  Hz, 1H), 6.47 (s, 1H), 6.74 (d,  $J = 8.3$  Hz, 2H), 6.92 (s, 1H), 7.00 (d,  $J = 8.3$  Hz, 2H), 7.21 (dd,  $J = 13.0, 6.8$  Hz, 3H), 7.35 (d,  $J = 7.8$  Hz, 1H);  $^{13}\text{C NMR}$  (75 MHz,  $\text{CDCl}_3$ )  $\delta$  55.33, 58.15, 108.76, 113.90 (2C), 122.74, 123.67, 126.24 (2C), 126.42, 128.62, 129.48, 129.49, 131.20, 133.20, 133.59, 135.49, 158.04; HRMS (ESI): Calcd for  $\text{C}_{18}\text{H}_{16}\text{ClNO}_2$  ( $\text{MH}^+$ ) 314.0948; Found 314.0947.

**(2-(3-chlorophenyl)-1-(4-methoxyphenyl)-1H-pyrrol-3-yl) methanol (7e):**

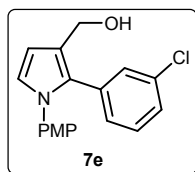

(65 mg, 70% yield);  $^1\text{H-NMR}$  (400 MHz,  $\text{CDCl}_3$ )  $\delta$  3.79 (s, 3H), 4.55 (s, 2H), 6.44 (d,  $J = 1.3$  Hz, 1H), 6.81 (d,  $J = 8.4$  Hz, 2H), 6.87 (d,  $J = 1.5$  Hz, 1H), 7.01 (d,  $J = 8.5$  Hz, 3H), 7.15 (d,  $J = 7.8$  Hz, 1H), 7.20 (d,  $J = 14.0$  Hz, 2H);  $^{13}\text{C NMR}$  (75 MHz,  $\text{CDCl}_3$ )  $\delta$  55.37, 57.88, 109.57, 114.14 (2C), 123.20, 123.53, 126.77 (2C), 126.88, 128.31, 129.14, 129.95, 130.26, 133.03, 133.38, 133.78, 158.21; HRMS (ESI): Calcd for  $\text{C}_{18}\text{H}_{16}\text{ClNO}_2$  ( $\text{MH}^+$ ) 314.0948; Found 314.0946.

**(2-(4-chlorophenyl)-1-(4-methoxyphenyl)-1H-pyrrol-3-yl) methanol (7f):**

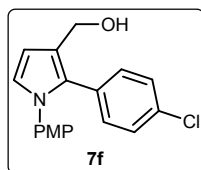

(67 mg, 72% yield);  $^1\text{H-NMR}$  (400 MHz,  $\text{CDCl}_3$ )  $\delta$  3.79 (s, 3H), 4.54 (s, 2H), 6.43 (d,  $J = 2.8$  Hz, 1H), 6.81 (d,  $J = 8.9$  Hz, 2H), 6.87 (d,  $J = 2.8$  Hz, 1H), 7.00 (d,  $J = 8.9$  Hz, 2H), 7.09 (d,  $J = 8.5$  Hz, 2H), 7.22 (d,  $J = 8.5$  Hz, 2H),  $^{13}\text{C NMR}$  (75 MHz,  $\text{CDCl}_3$ )  $\delta$  55.40, 58.01, 109.56, 114.13 (2C), 122.79, 123.38, 126.82 (2C), 128.27 (2C), 129.94, 130.65, 131.33 (2C), 132.80, 133.06, 158.15 HRMS (ESI): Calcd for  $\text{C}_{18}\text{H}_{16}\text{ClNO}_2$  ( $\text{MH}^+$ ) 314.0948; Found 314.0950.

**(2-(2-fluorophenyl)-1-(4-methoxyphenyl)-1H-pyrrol-3-yl) methanol (7g):**

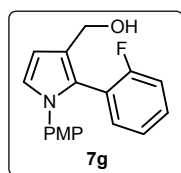

(55 mg, 63% yield);  $^1\text{H-NMR}$  (400 MHz,  $\text{CDCl}_3$ )  $\delta$  3.79 (s, 3H), 4.52 (s, 2H), 6.51 (d,  $J = 2.5$  Hz, 1H), 6.80 (d,  $J = 8.7$  Hz, 2H), 6.97 (d,  $J = 2.4$  Hz, 1H), 7.00-7.06 (m, 3H), 7.10 (d,  $J = 7.5$  Hz, 1H), 7.21 (t,  $J = 7.2$  Hz, 1H), 7.28 (d,  $J = 5.7$

Hz, 1H);  $^{13}\text{C NMR}$  (75 MHz,  $\text{CDCl}_3$ )  $\delta$  55.32, 58.04, 109.20, 113.94 (2C), 115.49, 115.72, 123.44, 123.84, 124.13, 125.16, 126.23 (2C), 129.58, 129.98, 133.31, 158.11, 161.42; HRMS (ESI): Calcd for  $\text{C}_{18}\text{H}_{16}\text{FNO}_2$  ( $\text{MH}^+$ ) 298.1243; Found 298.1240.

**(2-(3-fluorophenyl)-1-(4-methoxyphenyl)-1H-pyrrol-3-yl) methanol (7h):**

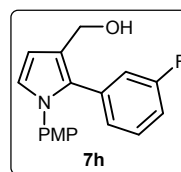

(57 mg, 65% yield);  $^1\text{H-NMR}$  (400 MHz,  $\text{CDCl}_3$ )  $\delta$  3.79 (s, 3H), 4.56 (s, 2H), 6.44 (d,  $J = 2.6$  Hz, 1H), 6.81 (d,  $J = 8.6$  Hz, 2H), 6.86-6.97 (m, 4H), 7.01 (d,  $J = 8.4$  Hz, 2H), 7.21 (t,  $J = 7.6$  Hz, 1H),  $^{13}\text{C NMR}$  (75 MHz,  $\text{CDCl}_3$ )  $\delta$  55.36,

57.90, 109.55, 113.81, 114.10 (2C), 116.94, 123.02, 123.50, 125.85, 126.73 (2C), 129.37, 130.45, 133.03, 133.63, 158.15, 161.30; HRMS (ESI): Calcd for  $\text{C}_{18}\text{H}_{16}\text{FNO}_2$  ( $\text{MH}^+$ ) 298.1243; Found 298.1241.

**(2-(4-fluorophenyl)-1-(4-methoxyphenyl)-1H-pyrrol-3-yl) methanol (7i):**

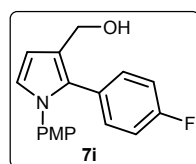

(64 mg, 73% yield);  $^1\text{H-NMR}$  (400 MHz,  $\text{CDCl}_3$ )  $\delta$  3.79 (s, 3H), 4.53 (s, 2H), 6.43 (d,  $J = 2.5$  Hz, 1H), 6.80 (d,  $J = 8.6$  Hz, 2H), 6.86 (d,  $J = 2.5$  Hz, 1H), 6.91-6.99 (m, 2H), 7.00 (d,  $J = 8.6$  Hz, 2H), 7.13 (t,  $J = 8.0$  Hz, 2H);  $^{13}\text{C NMR}$  (75 MHz,  $\text{CDCl}_3$ )  $\delta$  55.36, 58.01, 109.35, 114.07 (2C), 114.92, 115.14, 122.53, 122.98, 126.83 (2C), 127.57, 130.90, 131.81, 131.89, 133.18, 158.13, 163.02; HRMS (ESI): Calcd for  $\text{C}_{18}\text{H}_{16}\text{FNO}_2$  ( $\text{MH}^+$ ) 298.1243; Found 298.1245.

**(2-(2-bromophenyl)-1-(4-methoxyphenyl)-1H-pyrrol-3-yl) methanol (7j):**

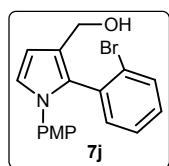

(63 mg, 60% yield);  $^1\text{H-NMR}$  (400 MHz,  $\text{CDCl}_3$ )  $\delta$  3.75 (s, 3H), 4.37 (d,  $J = 12.0$  Hz, 1H), 4.46 (d,  $J = 12.0$  Hz, 1H), 6.46 (d,  $J = 2.9$  Hz, 1H), 6.74 (d,  $J = 8.9$  Hz, 2H), 6.91 (d,  $J = 2.9$  Hz, 1H), 7.02 (d,  $J = 8.9$  Hz, 2H), 7.15 (ddd,  $J = 8.1, 5.6, 3.6$

Hz, 1H), 7.21–7.25 (m, 2H), 7.54 (d,  $J = 8.0$  Hz, 1H);  $^{13}\text{C NMR}$  (75 MHz,  $\text{CDCl}_3$ )  $\delta$  55.32, 58.19, 108.63, 113.87 (2C), 122.51, 123.38, 126.34 (2C), 126.98, 129.70, 130.43, 132.57, 133.13, 133.35, 133.70, 158.04; HRMS (ESI): Calcd for  $\text{C}_{18}\text{H}_{16}\text{BrNO}_2$  ( $\text{MH}^+$ ) 358.0442; Found 358.0446.

**(2-(3-bromophenyl)-1-(4-methoxyphenyl)-1H-pyrrol-3-yl) methanol (7k):**

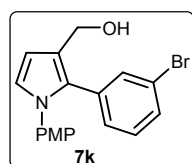

(69 mg, 65% yield);  $^1\text{H-NMR}$  (400 MHz,  $\text{CDCl}_3$ )  $\delta$  3.79 (s, 3H), 4.55 (s, 2H), 6.43 (d,  $J = 2.8$  Hz, 1H), 6.81 (d,  $J = 8.8$  Hz, 2H), 6.87 (d,  $J = 2.8$  Hz, 1H), 7.01 (d,  $J = 8.9$  Hz, 2H), 7.03 (s, 1H), 7.10 (t,  $J = 7.8$  Hz, 1H), 7.34 (d,  $J = 7.9$  Hz,

1H), 7.37 (s, 1H);  $^{13}\text{C NMR}$  (75 MHz,  $\text{CDCl}_3$ )  $\delta$  55.43, 57.93, 109.57, 114.14 (2C), 121.98, 123.10, 123.59, 126.80 (2C), 128.76, 129.45, 129.82, 130.19, 132.81, 132.96, 133.58, 158.20; HRMS (ESI): Calcd for  $\text{C}_{18}\text{H}_{16}\text{BrNO}_2$  ( $\text{MH}^+$ ) 358.0442; Found 358.0445.

**(2-(4-bromophenyl)-1-(4-methoxyphenyl)-1H-pyrrol-3-yl) methanol (7l):**

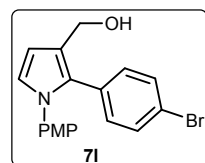

(77 mg, 73% yield);  $^1\text{H-NMR}$  (400 MHz,  $\text{CDCl}_3$ )  $\delta$  3.80 (s, 3H), 4.53 (s, 2H), 6.41 (d,  $J = 1.9$  Hz, 1H), 6.82 (d,  $J = 8.4$  Hz, 2H), 6.86 (d,  $J = 2.1$  Hz, 1H), 6.98 (dd,  $J = 11.9, 8.5$  Hz, 5H), 7.43 (d,  $J = 6.3$  Hz, 1H);  $^{13}\text{C NMR}$  (75 MHz,  $\text{CDCl}_3$ )  $\delta$  55.46, 57.92, 109.56, 114.26 (2C), 115.89, 116.11, 123.09, 123.51, 126.91 (2C), 129.20, 129.51, 130.72, 130.79, 132.87, 134.91, 158.37; HRMS (ESI): Calcd for  $\text{C}_{18}\text{H}_{16}\text{BrNO}_2$  ( $\text{MH}^+$ ) 358.0442; Found 358.0444.

### 3-(3-(hydroxymethyl)-1-(4-methoxyphenyl)-1H-pyrrol-2-yl) benzonitrile (7m):

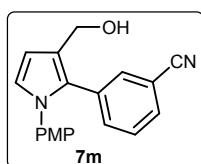

(56 mg, 62% yield);  $^1\text{H-NMR}$  (400 MHz,  $\text{CDCl}_3$ )  $\delta$  3.80 (s, 3H), 4.96 (s, 2H), 6.46 (d,  $J = 2.8$  Hz, 1H), 6.81 (d,  $J = 8.8$  Hz, 2H), 6.91 (d,  $J = 2.8$  Hz, 1H), 6.98 (d,  $J = 8.8$  Hz, 2H), 7.34-7.38 (m, 2H), 7.43 (s, 1H), 7.52 (d,  $J = 7.2$  Hz, 1H),  $^{13}\text{C NMR}$  (75 MHz,  $\text{CDCl}_3$ )  $\delta$  55.43, 59.72, 109.69, 112.33, 114.34 (2C), 118.53, 118.55, 124.17, 126.88 (2C), 128.99, 130.55, 130.59, 132.40, 132.67, 133.39, 134.36, 158.50; HRMS (ESI): Calcd for  $\text{C}_{19}\text{H}_{16}\text{N}_2\text{O}_2$  ( $\text{MH}^+$ ) 305.1290; Found 305.1294.

### 4-(3-(hydroxymethyl)-1-(4-methoxyphenyl)-1H-pyrrol-2-yl) benzonitrile (7n):

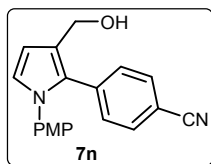

(63 mg, 70% yield);  $^1\text{H-NMR}$  (400 MHz,  $\text{CDCl}_3$ )  $\delta$  3.83 (s, 3H), 4.58 (s, 2H), 6.48 (d,  $J = 2.4$  Hz, 1H), 6.86 (d,  $J = 8.6$  Hz, 2H), 6.94 (d,  $J = 2.5$  Hz, 1H), 7.03 (d,  $J = 8.7$  Hz, 2H), 7.30 (d,  $J = 8.1$  Hz, 2H), 7.55 (d,  $J = 8.1$  Hz, 2H);  $^{13}\text{C NMR}$  (75 MHz,  $\text{CDCl}_3$ )  $\delta$  55.44, 57.88, 110.23, 114.37 (2C), 118.89, 124.21, 124.66, 126.84 (2C), 129.91, 130.25 (2C), 131.75 (2C), 132.09, 132.81, 136.23, 158.51; HRMS (ESI): Calcd for  $\text{C}_{19}\text{H}_{16}\text{N}_2\text{O}_2$  ( $\text{MH}^+$ ) 305.1290; Found 305.1293.

### (2-(2,4-dichlorophenyl)-1-(4-methoxyphenyl)-1H-pyrrol-3-yl)methanol (7o):

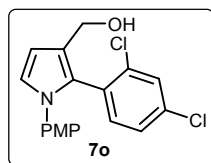



(62 mg, 60% yield);  $^1\text{H-NMR}$  (400 MHz,  $\text{CDCl}_3$ )  $\delta$  3.77 (s, 3H), 4.26 (d,  $J = 11.4$  Hz, 1H), 4.36 (d,  $J = 11.4$  Hz, 1H), 6.42 (d,  $J = 2.8$  Hz, 1H), 6.76 (d,  $J = 8.9$  Hz, 2H), 6.92 (d,  $J = 2.8$  Hz, 1H), 6.97 (d,  $J = 8.7$  Hz, 2H), 7.19 (s, 2H), 7.35 (d,  $J = 0.9$  Hz, 1H);  $^{13}\text{C NMR}$  (75 MHz,  $\text{CDCl}_3$ )  $\delta$  55.32, 58.19, 108.63, 113.87 (2C), 122.51, 123.38, 126.34, 126.38 (2C), 126.98, 129.70, 130.43, 132.57, 133.13, 133.35, 133.70, 158.04; HRMS (ESI): Calcd for  $\text{C}_{18}\text{H}_{15}\text{Cl}_2\text{NO}_2$  ( $\text{MH}^+$ ) 348.0558; Found 348.0552.

**(2-(3, 4-dichlorophenyl)-1-(4-methoxyphenyl)-1H-pyrrol-3-yl) methanol (7p):**

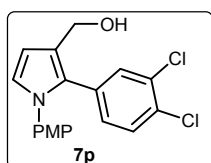

(65 mg, 63% yield);  $^1\text{H-NMR}$  (400 MHz,  $\text{CDCl}_3$ )  $\delta$  3.80 (s, 3H), 4.54 (s, 2H), 6.42 (d,  $J = 2.7$  Hz, 1H), 6.83 (d,  $J = 8.7$  Hz, 2H), 6.87 (d,  $J = 2.7$  Hz, 1H), 6.93 (dd,  $J = 8.6, 2.2$  Hz, 1H), 7.01 (d,  $J = 8.6$  Hz, 2H), 7.29 (d,  $J = 8.7$  Hz,

1H), 7.33 (d,  $J = 1.7$  Hz, 1H);  $^{13}\text{C-NMR}$  (75 MHz,  $\text{CDCl}_3$ )  $\delta$  55.43, 57.93, 109.57, 114.14 (2C), 121.98, 123.10, 123.59, 126.80 (2C), 128.76, 129.45, 129.82, 130.19, 132.88, 132.96, 133.58, 158.20; HRMS (ESI): Calcd for  $\text{C}_{18}\text{H}_{15}\text{Cl}_2\text{NO}_2$  ( $\text{MH}^+$ ) 348.0558; Found 348.0556.

**(2-(3-bromo-4-fluorophenyl)-1-(4-methoxyphenyl)-1H-pyrrol-3-yl) methanol (7q):**

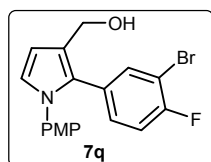

(77 mg, 69% yield);  $^1\text{H-NMR}$  (400 MHz,  $\text{CDCl}_3$ )  $\delta$  3.79 (s, 3H), 4.41 (s, 1H), 4.56 (s, 1H), 6.47 (m, 1H), 6.82 (d,  $J = 8.4$  Hz, 2H), 6.87 (t,  $J = 2.8$  Hz, 1H), 7.01 (d,  $J = 8.3$  Hz, 2H), 7.07 (dd,  $J = 14.7, 7.7$  Hz, 1H), 7.30-7.39 (m, 2H);

$^{13}\text{C NMR}$  (75 MHz,  $\text{CDCl}_3$ )  $\delta$  55.44, 57.98, 109.58, 110.90, 114.20 (2C), 120.84, 121.94, 123.60, 126.84 (2C), 128.79, 129.27, 129.35, 129.84, 132.88, 133.30, 158.18; HRMS (ESI): Calcd for  $\text{C}_{18}\text{H}_{15}\text{BrFNO}_2$  ( $\text{MH}^+$ ) 376.0348; Found 376.0344.

**(1-(4-methoxyphenyl)-2-(pyridin-2-yl)-1H-pyrrol-3-yl) methanol (7r):**

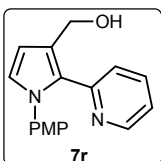

(54 mg, 65% yield);  $^1\text{H-NMR}$  (400 MHz,  $\text{CDCl}_3$ )  $\delta$  3.83 (s, 4H), 4.50 (s, 2H), 6.35 (d,  $J = 2.6$  Hz, 1H), 6.62 (d,  $J = 8.1$  Hz, 1H), 6.81 (d,  $J = 2.6$  Hz, 1H), 6.88 (d,  $J = 8.9$  Hz, 2H), 7.05 (dd,  $J = 7.3, 5.0$  Hz, 1H), 7.11 (d,  $J = 8.8$  Hz, 2H), 7.39 (td,  $J = 8.3, 1.6$  Hz, 1H), 8.56 (d,  $J = 4.9$  Hz, 1H),  $^{13}\text{C NMR}$  (75 MHz,  $\text{CDCl}_3$ )  $\delta$  55.48, 58.05, 110.54, 114.42 (2C), 120.44, 123.20, 124.96, 126.94 (2C), 128.66, 130.35, 133.50, 135.94, 148.41, 150.70, 158.62; HRMS (ESI): Calcd for  $\text{C}_{17}\text{H}_{16}\text{N}_2\text{O}_2$  ( $\text{MH}^+$ ) 281.1290; Found 281.1293.

**(1-(4-methoxyphenyl)-2-(pyridin-3-yl)-1H-pyrrol-3-yl) methanol (7s):**

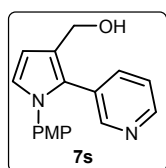

(55 mg, 67% yield);  $^1\text{H-NMR}$  (400 MHz,  $\text{CDCl}_3$ )  $\delta$  3.78 (s, 3H), 4.55 (s, 2H), 6.46 (d,  $J = 2.4$  Hz, 1H), 6.80 (d,  $J = 8.7$  Hz, 2H), 6.90 (d,  $J = 2.5$  Hz, 1H), 7.00 (d,  $J = 8.7$  Hz, 2H), 7.18 (dd,  $J = 7.5, 5.1$  Hz, 1H), 7.47 (d,  $J = 7.9$  Hz, 1H), 8.41

(s, 2H);  $^{13}\text{C NMR}$  (75 MHz,  $\text{CDCl}_3$ )  $\delta$  55.41, 57.78, 109.87, 114.33 (2C), 122.97, 123.84, 124.10, 127.02 (2C), 127.89, 128.20, 132.78, 137.35, 147.53, 150.41, 158.44; HRMS (ESI): Calcd for  $\text{C}_{17}\text{H}_{16}\text{N}_2\text{O}_2$  ( $\text{MH}^+$ ) 281.1290; Found 281.1292.

**(1-(4-methoxyphenyl)-2-(pyridin-4-yl)-1H-pyrrol-4-yl) methanol (7t):**

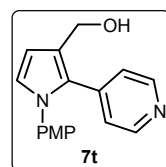

(56 mg, 68% yield);  $^1\text{H-NMR}$  (400 MHz,  $\text{CDCl}_3$ )  $\delta$  3.66 (s, 1H), 3.80 (s, 3H), 4.57 (s, 2H), 6.45 (d,  $J = 2.5$  Hz, 1H), 6.83 (d,  $J = 8.7$  Hz, 2H), 6.91 (d,  $J = 2.6$  Hz, 1H), 7.01 (d,  $J = 8.7$  Hz, 2H), 7.11 (d,  $J = 4.5$  Hz, 2H), 8.44 (bs, 2H),  $^{13}\text{C}$

NMR (75 MHz,  $\text{CDCl}_3$ )  $\delta$  55.44, 57.67, 109.54, 114.41 (2C), 124.25, 125.06, 125.30, 126.06, 126.83 (2C), 128.53, 132.67, 138.48, 140.11, 148.29, 158.58; HRMS (ESI): Calcd for  $\text{C}_{17}\text{H}_{16}\text{N}_2\text{O}_2$  ( $\text{MH}^+$ ) 281.1290; Found 281.1294.

**(1-(4-methoxyphenyl)-2-(thiophen-2-yl)-1H-pyrrol-3-yl) methanol (7u):**

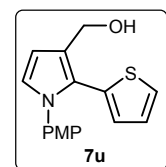

(50 mg, 60% yield);  $^1\text{H-NMR}$  (400 MHz,  $\text{CDCl}_3$ )  $\delta$  3.80 (s, 3H), 4.61 (s, 2H), 6.41 (d,  $J = 2.5$  Hz, 1H), 6.83 (d,  $J = 9.0$  Hz, 4H), 6.4 (t, 3.8 Hz, 1H), 7.10 (d,  $J = 8.7$  Hz, 2H), 7.23 (d,  $J = 5.1$  Hz, 1H),  $^{13}\text{C NMR}$  (75 MHz,  $\text{CDCl}_3$ )  $\delta$  55.40, 58.11, 109.38, 113.97 (2C), 123.63, 123.98, 125.17, 126.22, 126.76, 127.40 (2C), 128.05, 132.45, 132.96, 158.62; HRMS (ESI): Calcd for  $\text{C}_{16}\text{H}_{15}\text{SNO}_2$  ( $\text{MH}^+$ ) 286.0901; Found 281.0905.

**(1-(4-methoxyphenyl)-2-(5-nitrofuran-2-yl)-1H-pyrrol-3-yl) methanol (7v):**

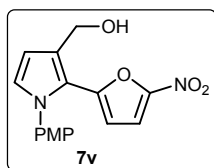

(63 mg, 67% yield);  $^1\text{H-NMR}$  (500 MHz,  $\text{CDCl}_3$ )  $\delta$  3.87 (s, 3H), 4.84 (s, 2H), 5.63 (d,  $J = 3.9$  Hz, 1H), 6.44 (d,  $J = 2.7$  Hz, 1H), 6.87 (d,  $J = 2.7$  Hz, 1H), 6.97 (d,  $J = 8.9$  Hz, 2H), 7.19 (d,  $J = 3.9$  Hz, 1H), 7.22 (d,  $J = 8.9$  Hz, 2H),

$^{13}\text{C NMR}$  (75 MHz,  $\text{CDCl}_3$ )  $\delta$  55.59, 58.32, 108.43, 111.17, 113.85, 114.52 (2C), 120.14, 127.26, 127.93 (2C), 128.59, 132.12, 139.28, 150.23, 159.74; HRMS (ESI): Calcd for  $\text{C}_{16}\text{H}_{14}\text{N}_2\text{O}_5$  ( $\text{MH}^+$ ) 315.0981; Found 315.0985.

**(1-(4-methoxyphenyl)-2-(naphthalen-1-yl)-1H-pyrrol-3-yl) methanol (7w):**

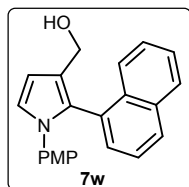

(54 mg, 55% yield);  $^1\text{H-NMR}$  (500 MHz,  $\text{CDCl}_3$ )  $\delta$  3.65 (s, 3H), 4.31 (d,  $J = 12.0$  Hz, 1H), 4.42 (d,  $J = 12.0$  Hz, 1H), 6.55 (d,  $J = 2.9$  Hz, 1H), 6.59 (d,  $J = 9.0$  Hz, 2H), 6.93 (d,  $J = 9.0$  Hz, 2H), 7.01 (d,  $J = 2.9$  Hz, 1H), 7.33 (dd,  $J =$

7.0, 1.1 Hz, 1H), 7.36–7.40 (m, 2H), 7.64 (d,  $J = 8.4$  Hz, 1H), 7.81 (t,  $J = 8.0$  Hz, 3H),  $^{13}\text{C NMR}$  (75 MHz,  $\text{CDCl}_3$ )  $\delta$  55.22, 58.22, 108.80, 113.75 (2C), 114.07, 122.65, 124.05, 125.07, 125.80, 125.85, 125.90 (2C), 126.29, 128.13, 128.44, 129.52, 129.99, 133.36, 133.41, 133.44, 157.71; HRMS (ESI): Calcd for  $\text{C}_{22}\text{H}_{19}\text{NO}_2$  ( $\text{MH}^+$ ) 330.1494; Found 330.1498.

**1-(4-methoxyphenyl)-1,4-dihydrochromeno [4, 3-b] pyrrole (18):** In a two-necked round

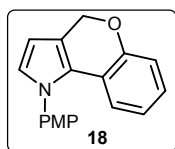

bottom flask fitted with condenser, substrate **7j** (0.05 g, 0.14 mmol),  $\text{KO}^t\text{Bu}$  (31

mg, 0.28 mmol), and Pd(OAc)<sub>2</sub> (1.0 mg, 2 mol %), PPh<sub>3</sub> (7.3 mg, 20 mol %), added in dry DMF (3 mL) was taken and degassed for 10 minutes with N<sub>2</sub> and reaction mixture was heated at 110 °C for 3 h. The reaction mixture was allowed to cool to rt and quenched with saturated NaHCO<sub>3</sub> solution (5 mL) and extracted with EtOAc (3 × 5 mL). The combined organic layer was washed with brine and dried over anhydrous Na<sub>2</sub>SO<sub>4</sub>. The organic solvent was evaporated under vacuo and purified through silica gel column chromatography by eluting with hexane/EtOAc (90:10). The product **18** was obtained as colorless oil (24 mg, 63% isolated yield). <sup>1</sup>H NMR (400 MHz, CDCl<sub>3</sub>) δ 7.75 (dd, *J* = 7.8, 1.7 Hz, 1H), 7.53 (dd, *J* = 8.0, 1.1 Hz, 1H), 7.37 (td, *J* = 7.4, 0.9 Hz, 1H), 7.23–7.26 (m, 2H), 7.12 – 7.17 (m, 1H), 6.89 – 6.94 (m, 3H), 6.84–6.86 (m, 1H), 6.18 (s, 1H), 3.82 (s, 3H); <sup>13</sup>C NMR (75 MHz, CDCl<sub>3</sub>) δ 55.41, 57.82, 109.94, 114.38 (2C), 121.44, 123.81, 124.26, 124.59, 126.99 (2C), 128.87, 129.35, 132.63, 133.32, 135.79, 147.96, 158.52; HRMS (ESI): Calcd for C<sub>18</sub>H<sub>15</sub>NO<sub>2</sub> (MH<sup>+</sup>) 278.1181; Found 278.1184.

**1-(4-methoxyphenyl)-4, 5-dihydro-1H-pyrrolo [3, 2-*c*] quinoline (19):**

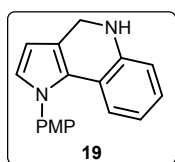

To a stirred solution of compound **7a** (97 mg, 0.3 mmol) in CH<sub>2</sub>Cl<sub>2</sub> (3 mL) was added Et<sub>3</sub>N (3.0 equiv, 0.9 mmol) at rt. Reaction was taken to 0 °C and TsCl (68 mg, 0.36 mmol) in CH<sub>2</sub>Cl<sub>2</sub> (2.0 mL) was added drop wise and then stirred at rt for additional 4 hr. Progress of the reaction was monitored by TLC. Reaction was stirred with NH<sub>4</sub>Cl (20% sol. 5.0 mL) and extracted with additional CH<sub>2</sub>Cl<sub>2</sub> (5.0 mL). The combined organic layer was washed with brine solution and concentrated under vacuo to give crude solid mass. This was used further without purification at this stage. To this crude mass was added ethanol and acetic acid (3mL, 2:1 ratio respectively) and Fe powder (125 mg, 7.5 equiv, 2.2 mmol) and FeCl<sub>3</sub> (9.5 mg, 0.2 equiv, 0.06 mmol) were added while stirring. The reaction mixture was

refluxed for 6 hours and monitored by TLC. After completion of the reaction, ethanol was evaporated under reduced pressure. The reaction mixture was filtered through celite and washed with the CH<sub>2</sub>Cl<sub>2</sub> (10 mL). The organic layer was stirred with NaHCO<sub>3</sub> solution (5 mL) and extracted with CH<sub>2</sub>Cl<sub>2</sub> (10 mL). The combined organic layer was washed with brine solution, dried over Na<sub>2</sub>SO<sub>4</sub> and concentrated under reduced pressure. The crude residue was purified by silica-gel column chromatography (EtOAc/hexanes) to afford **19** as brownish pasty liquid (48 mg, 58% yield).

<sup>1</sup>H NMR (400 MHz, CDCl<sub>3</sub>) δ 7.09 – 7.14 (m, 1H), 7.05 (d, *J* = 9.0 Hz, 2H), 6.94 (d, *J* = 3.1 Hz, 1H), 6.87 (dd, *J* = 7.9, 1.6 Hz, 1H), 6.76 (d, *J* = 9.0 Hz, 2H), 6.67 (s, 1H), 6.62 – 6.66 (m, 2H), 6.62 (d, *J* = 3.1 Hz, 1H), 3.82 (d, *J* = 19.7 Hz, 1H), 3.75 (s, 3H), 3.69 (d, *J* = 12.6 Hz, 1H); <sup>13</sup>C NMR (75 MHz, CDCl<sub>3</sub>) δ 55.34, 59.93, 109.37, 113.76, 114.03 (2C), 115.35, 118.14, 120.42, 124.43, 125.40, 125.80 (2C), 129.92, 132.45, 138.30, 145.84, 158.28; HRMS (ESI): Calcd for C<sub>18</sub>H<sub>16</sub>N<sub>2</sub>O (MH<sup>+</sup>); 277.1341 Found 277.1345.

### **1, 5-bis(4-methoxyphenyl)-4,5-dihydro-1*H*-pyrrolo[3,2-*c*] quinoline (20):**

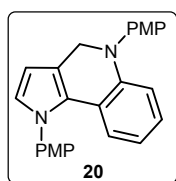

To a stirred solution of compound **7a** (90 mg, 0.28 mmol) in CH<sub>2</sub>Cl<sub>2</sub> (3 mL) was added Et<sub>3</sub>N (3.0 equiv, 0.83 mmol) at rt. Reaction was taken to 0 °C and TsCl (63 mg, 0.33 mmol) in CH<sub>2</sub>Cl<sub>2</sub> (2.0 mL) was added drop wise and then stirred at rt for additional 4 hr. Progress of the reaction was monitored by TLC. Reaction was stirred with NH<sub>4</sub>Cl (20% sol. 5 mL) and extracted with additional CH<sub>2</sub>Cl<sub>2</sub> (5.0 mL). The combined organic layer was washed with brine solution and concentrated under vacuo to give crude solid mass. This was used further without purification at this stage. To this crude mass in DMF (3 mL) was added *p*-anisidine (34 mg, 0.27 mmol, 1.0 equiv) and heated at 80 °C for 2 hr. Next, to this reaction mixture, K<sub>2</sub>CO<sub>3</sub> (76 mg, 0.55 mmol, 2.0 equiv.), CuI (10 mg, 20 mol %), L-proline as

ligand (13 mg, 40 mol %) were added and further heated at 110 °C for additional 3 h under an N<sub>2</sub> atmosphere. Progress of this reaction was monitored by TLC. The reaction was cooled to rt and quenched with water (8.0 mL) and extracted with EtOAc (3 × 8.0 mL). The combined organic layer was dried over anhydrous Na<sub>2</sub>SO<sub>4</sub> and evaporated under vacuo. The crude mass was purified using silica-gel column chromatography by eluting with hexane/EtOAc to afford **20** as yellow pasty liquid (93 mg, 87% yield). <sup>1</sup>H NMR (400 MHz, CDCl<sub>3</sub>) δ 7.67 (dd, *J* = 7.8, 1.7 Hz, 1H), 7.56 (dd, *J* = 7.9, 1.2 Hz, 1H), 7.28 – 7.33 (m, 1H), 7.23 (d, *J* = 9.0 Hz, 2H), 7.08 – 7.14 (m, 1H), 6.93 (d, *J* = 2.4 Hz, 1H), 6.90 (d, *J* = 9.0 Hz, 2H), 6.74 (d, *J* = 1.8 Hz, 1H), 6.72 (d, *J* = 9.0 Hz, 2H), 6.47 (d, *J* = 8.9 Hz, 2H), 6.25 (dd, *J* = 2.8, 1.8 Hz, 1H), 5.80 (s, 1H), 3.81 (s, 3H), 3.70 (s, 3H); <sup>13</sup>C NMR (101 MHz, CDCl<sub>3</sub>) δ 157.62, 151.97, 142.23, 141.30, 134.14, 132.93, 128.44, 128.15, 127.80, 126.79, 123.57, 121.93 (2C), 119.96, 118.18, 114.77 (2C), 114.55 (2C), 114.25 (2C), 109.20, 56.26, 55.70, 55.52; HRMS (ESI): Calcd for C<sub>25</sub>H<sub>22</sub>N<sub>2</sub>O<sub>2</sub> (MH<sup>+</sup>) 383.1759; Found 383.1762.

**3-(azidomethyl)-2-(2-fluorophenyl)-1-(4-methoxyphenyl)-1H-pyrrole (22):**

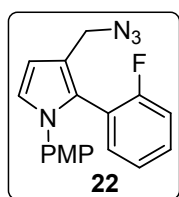

<sup>1</sup>H NMR (400 MHz, CDCl<sub>3</sub>) δ 3.74 (s, 3H), 4.63 (s, 2H), 6.46 (d, *J* = 2.5 Hz, 1H), 6.75 (d, *J* = 8.7 Hz, 2H), 6.92 (d, *J* = 2.4 Hz, 1H), 6.96 (d, *J* = 9.3 Hz, 1H), 6.99 (d, *J* = 8.6 Hz, 2H), 7.04 (t, *J* = 7.5 Hz, 1H), 7.16 (t, *J* = 7.2 Hz, 1H), 7.20 – 7.24 (m, 1H); <sup>13</sup>C NMR (75 MHz, CDCl<sub>3</sub>) δ 55.32, 56.04, 109.20, 113.94 (2C), 115.49, 115.72, 123.44, 123.84, 124.13, 125.16, 126.23 (2C), 129.58, 132.98, 133.31, 158.11, 161.42; IR (KBr)/cm<sup>-1</sup> 2965, 2052, 1612, 1512, 1466, 1319, 1134, 1034, 964; HRMS (ESI): Calcd for C<sub>18</sub>H<sub>15</sub>FN<sub>4</sub>O (M-H<sup>+</sup>) 322.1308; Found 322.1312.

SAPA-01  
SAPA-01

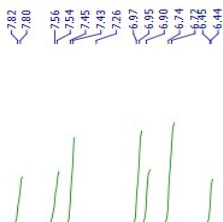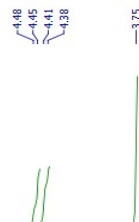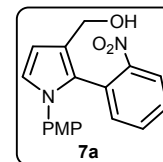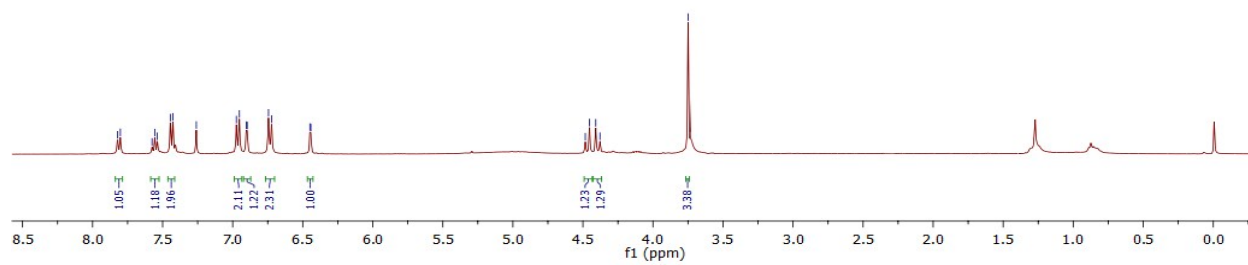

SAPA-01  
SAPA-01

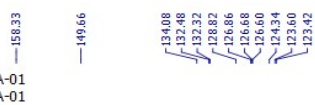

77.00  
57.77  
55.37

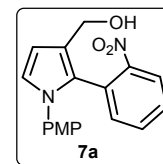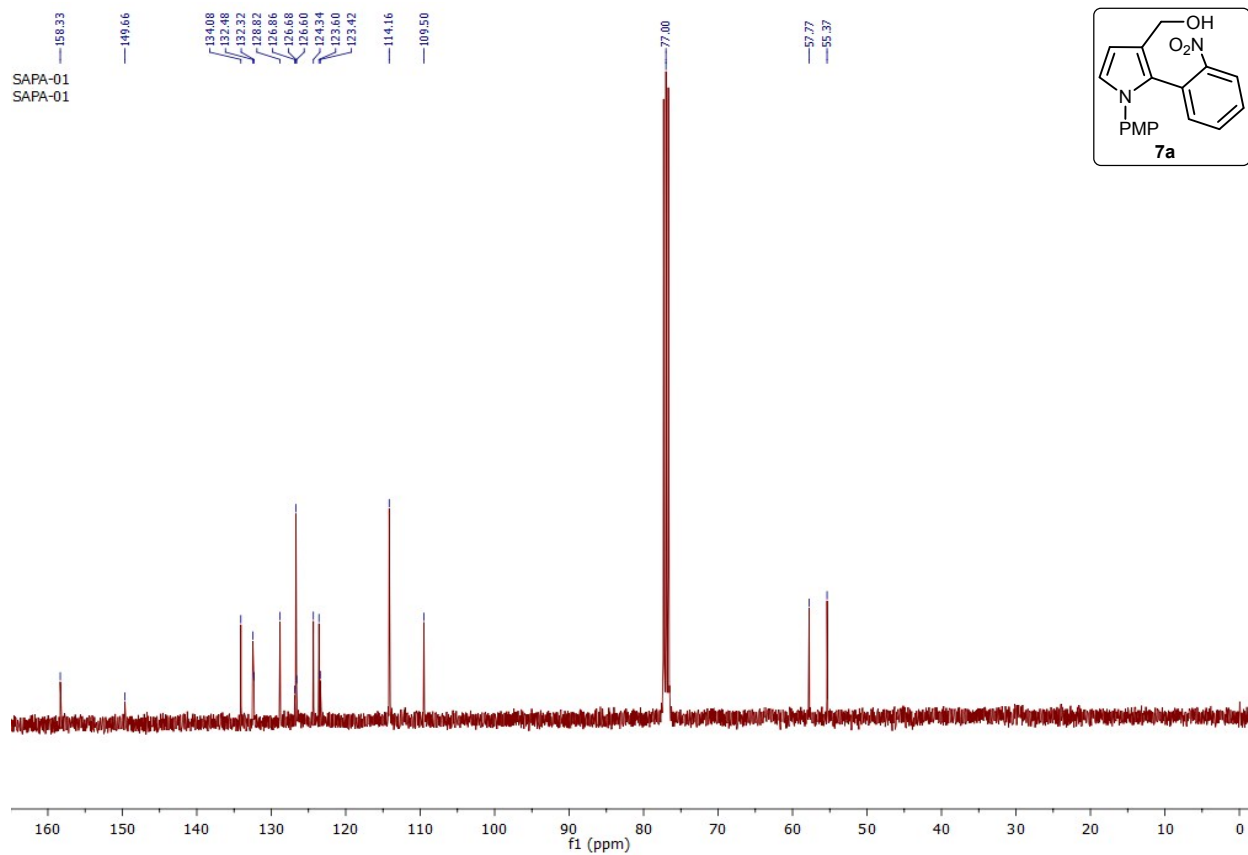

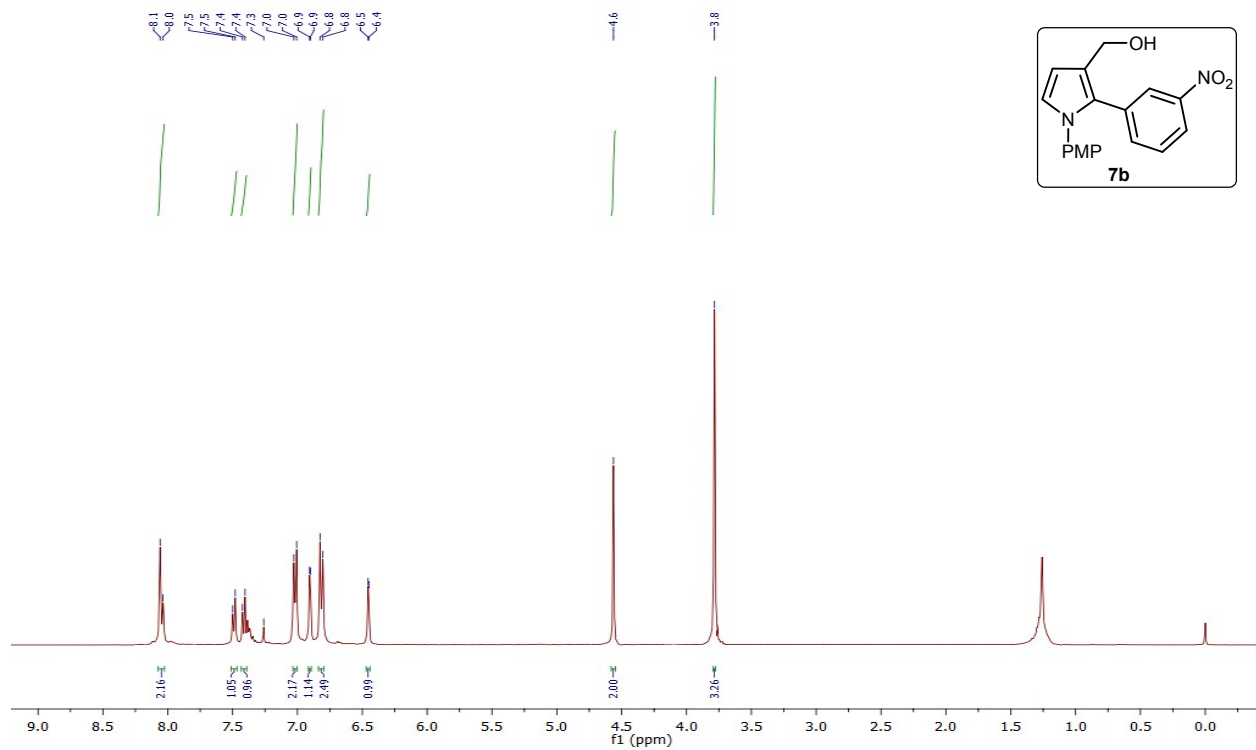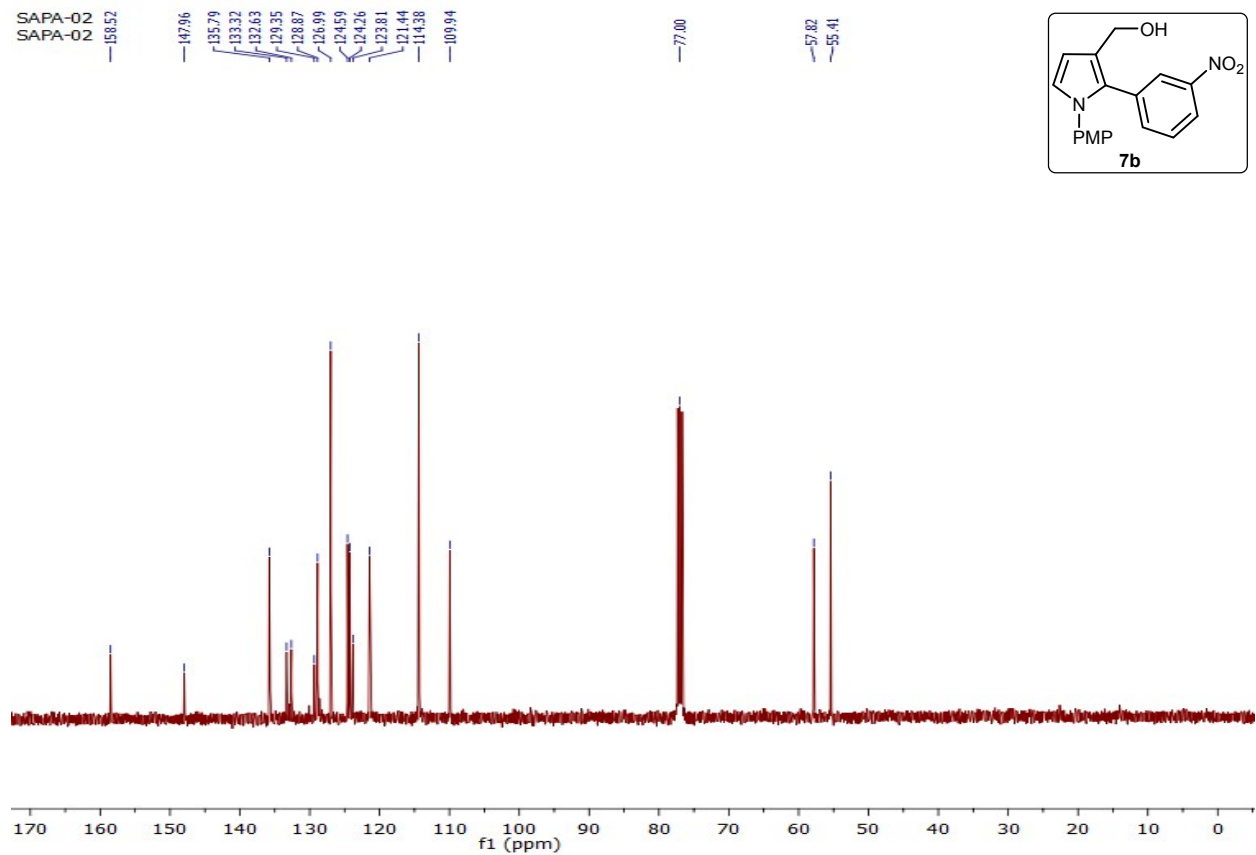



SAPA-03  
SAPA-03

7.33  
7.30  
7.26  
7.01  
6.99  
6.92  
6.83  
6.81  
6.45

4.55

3.79

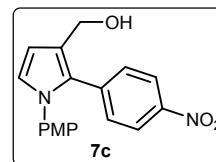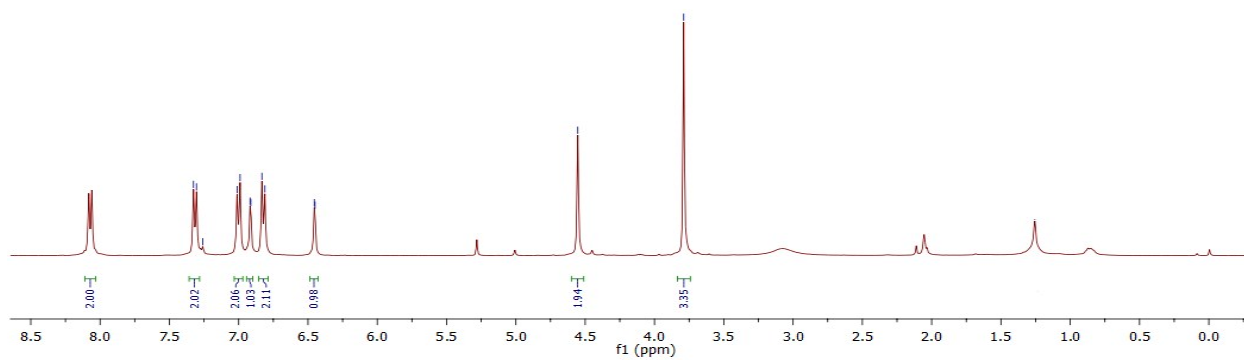

SAPA-03  
SAPA-03

158.47

145.89

138.18

132.57

130.12

129.46

126.78

124.99

124.60

123.21

114.36

110.40

77.00

57.69

55.36

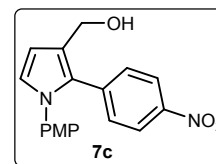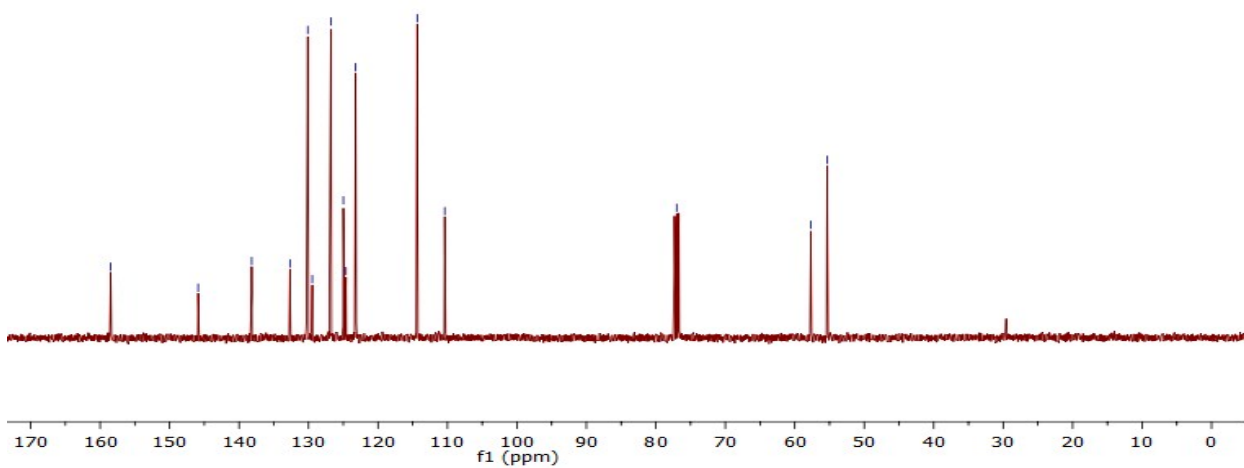

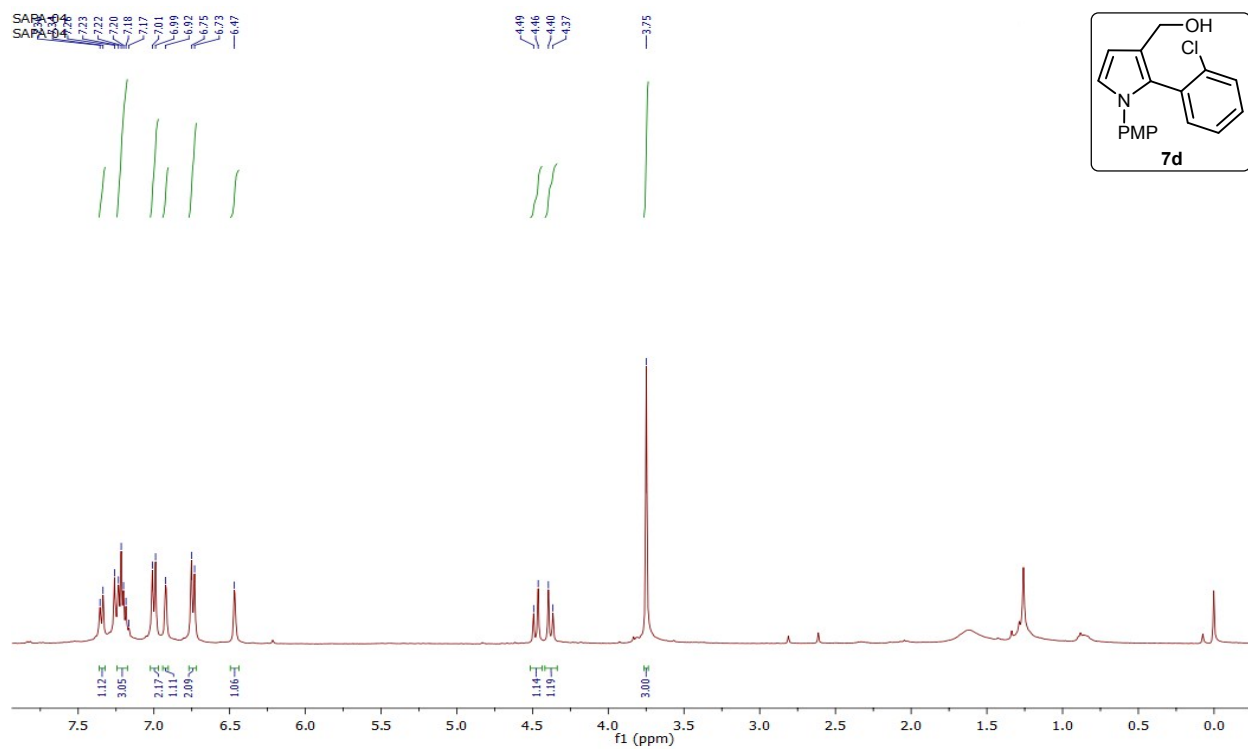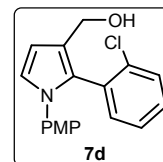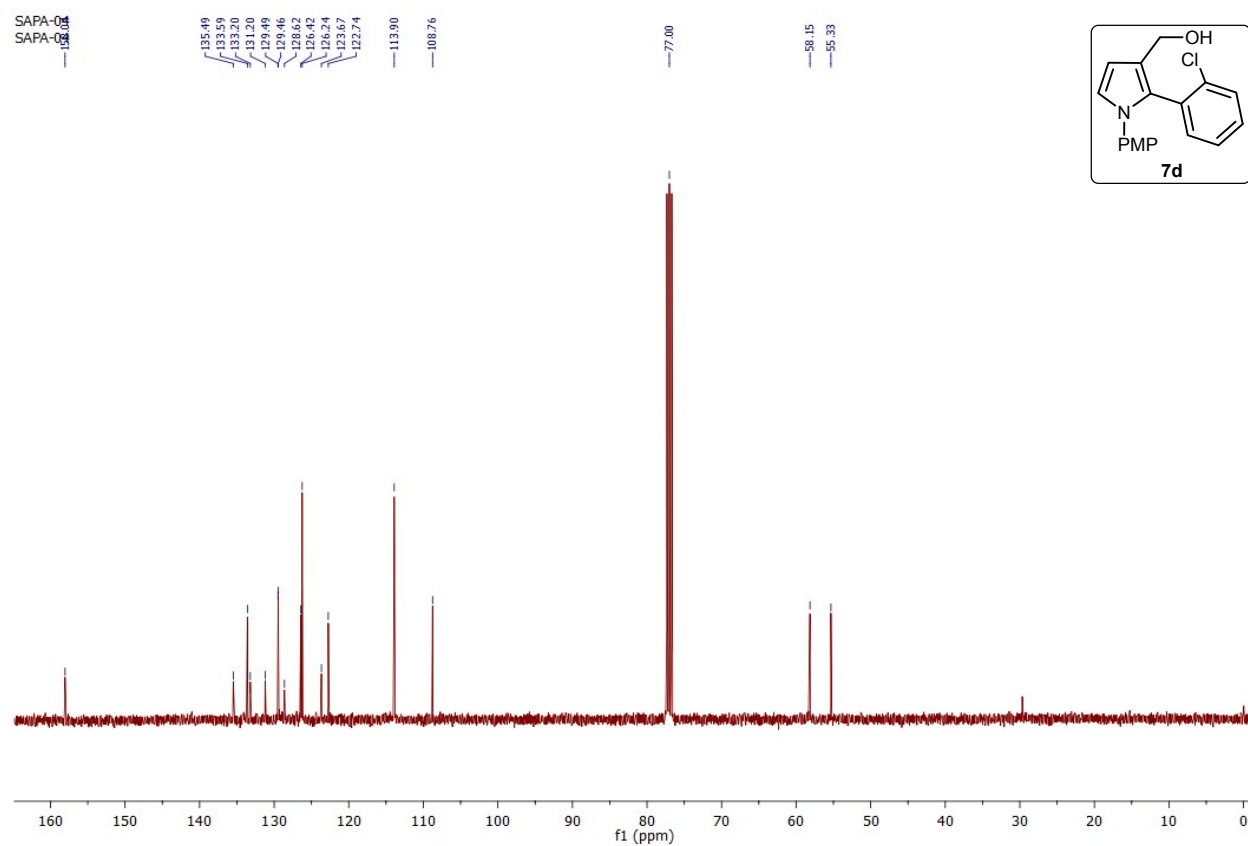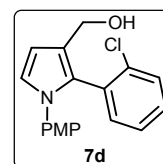

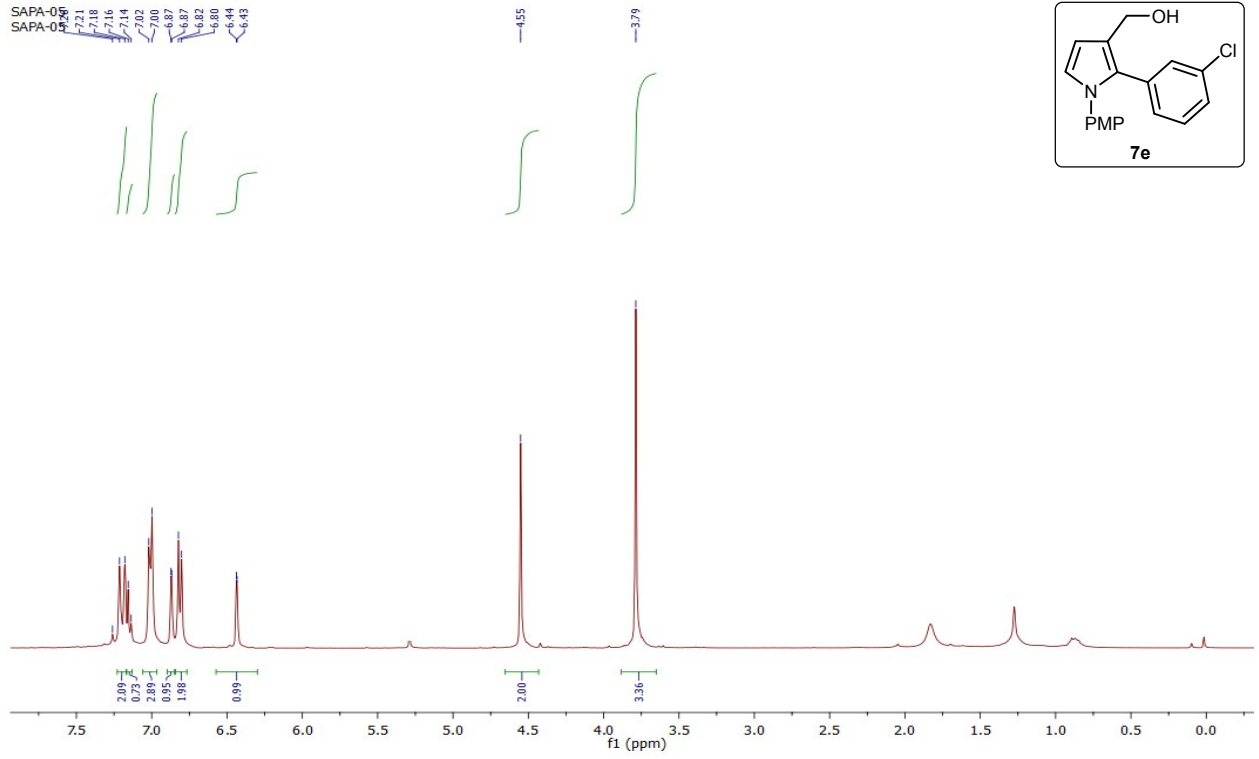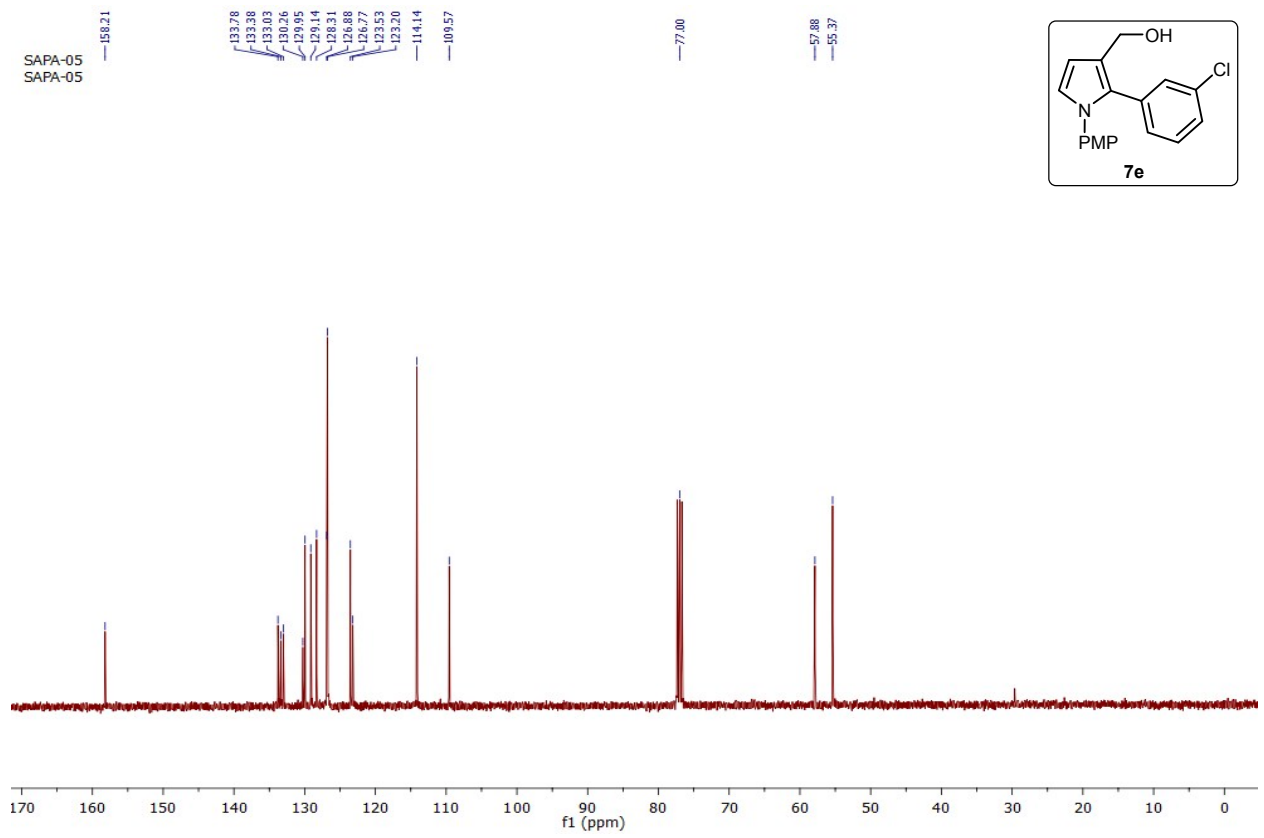

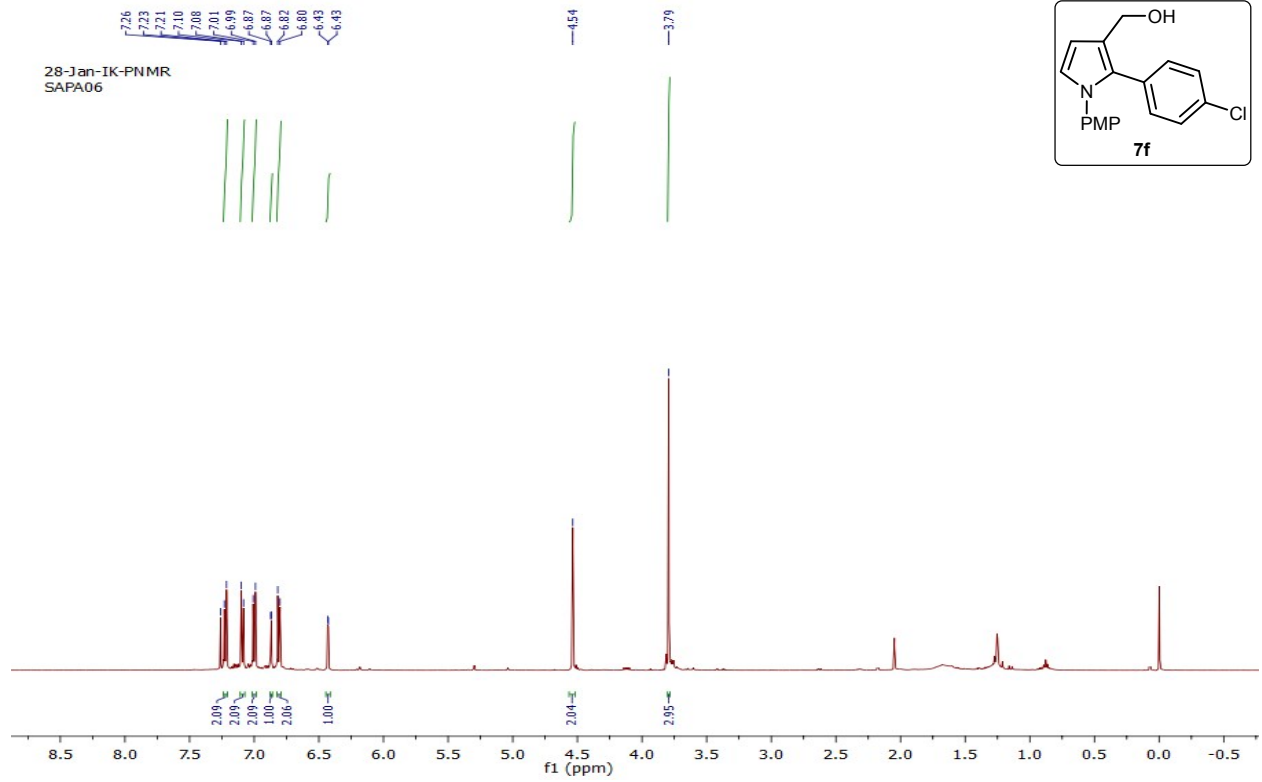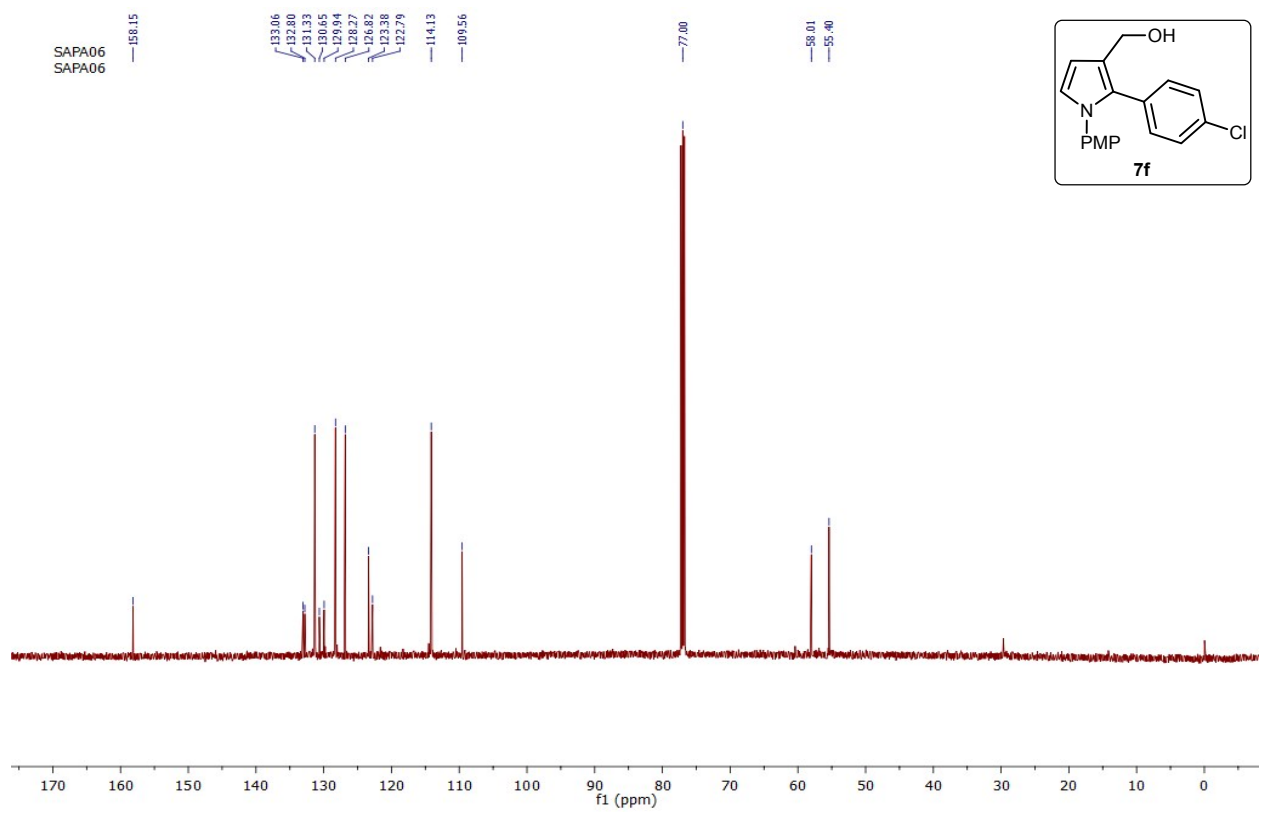

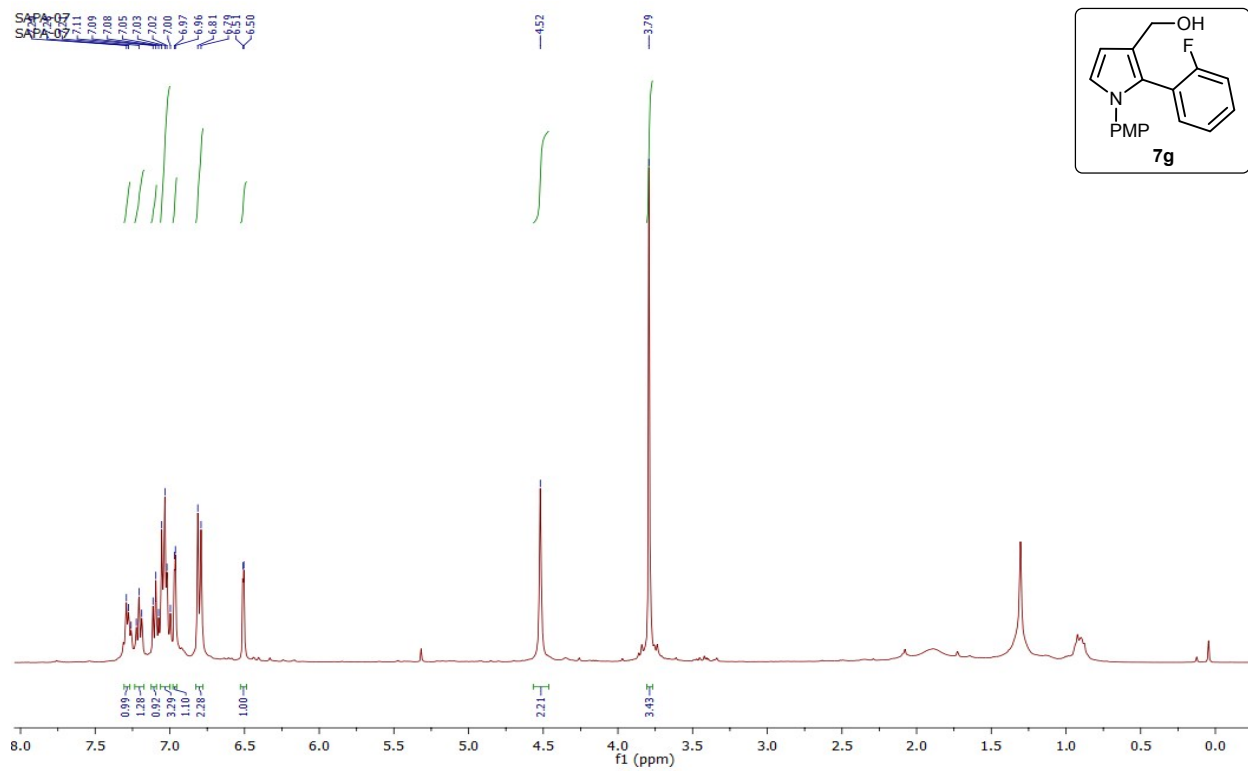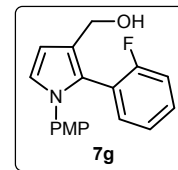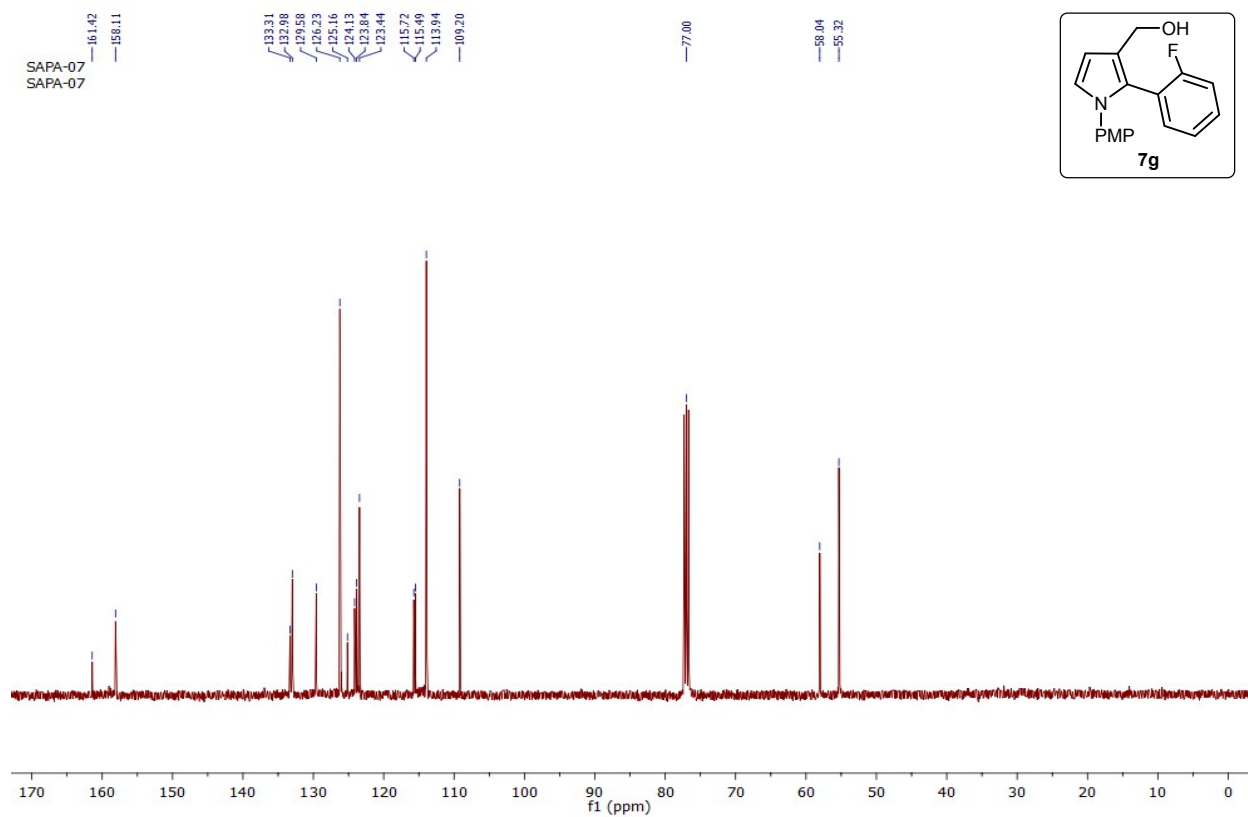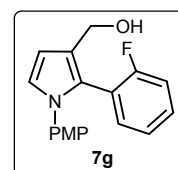

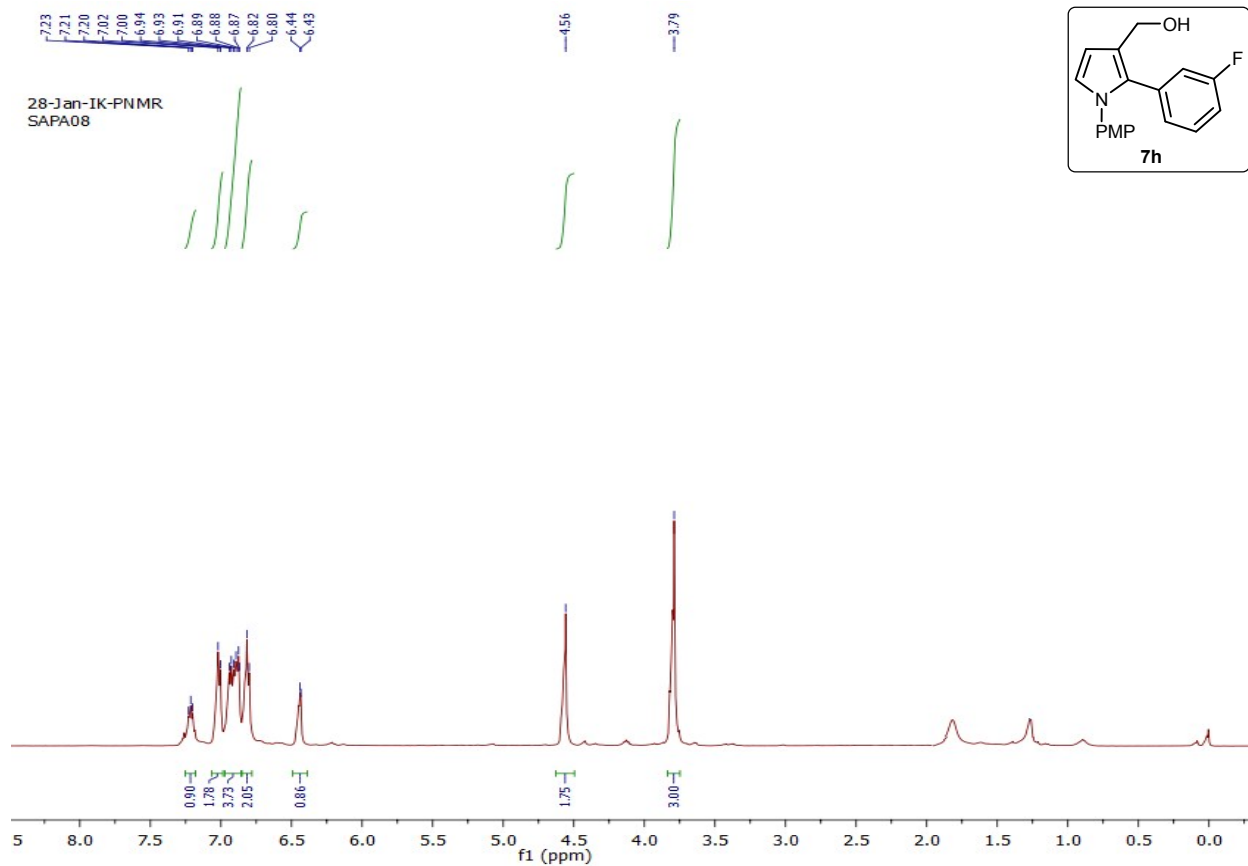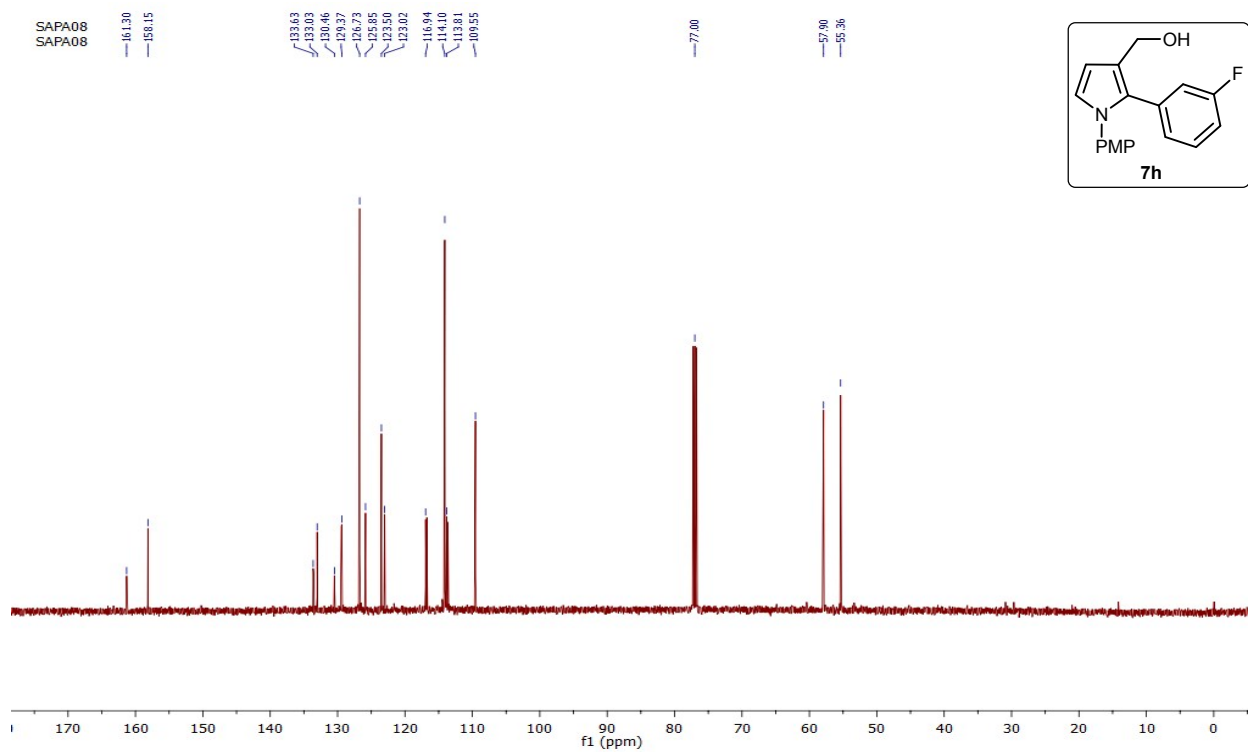

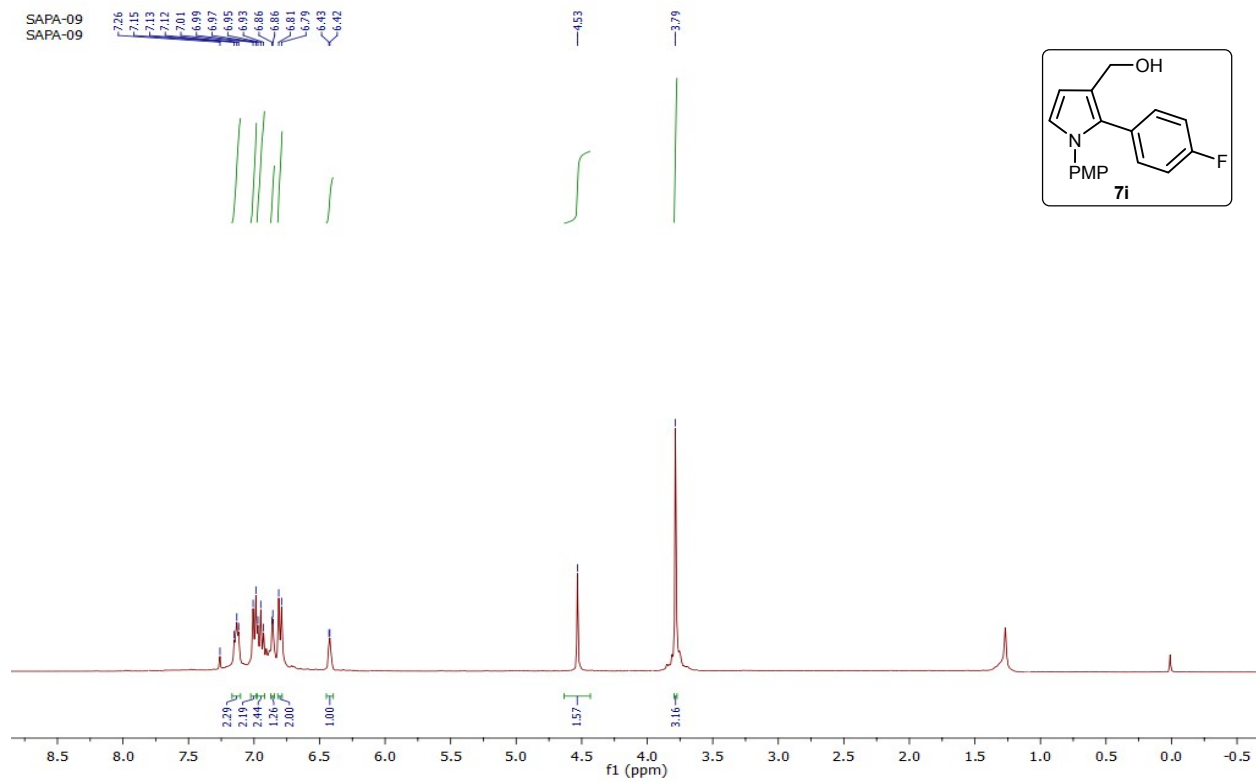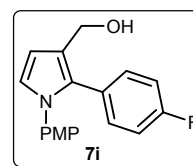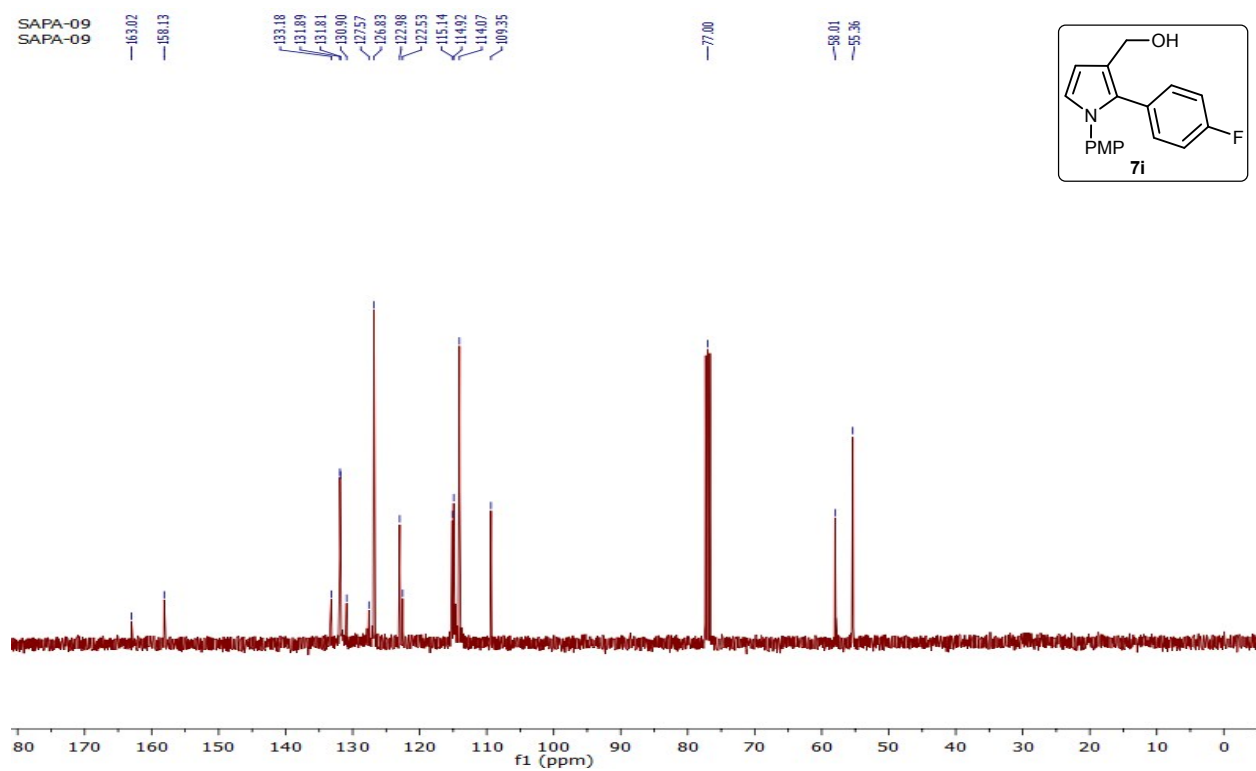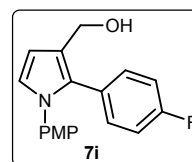

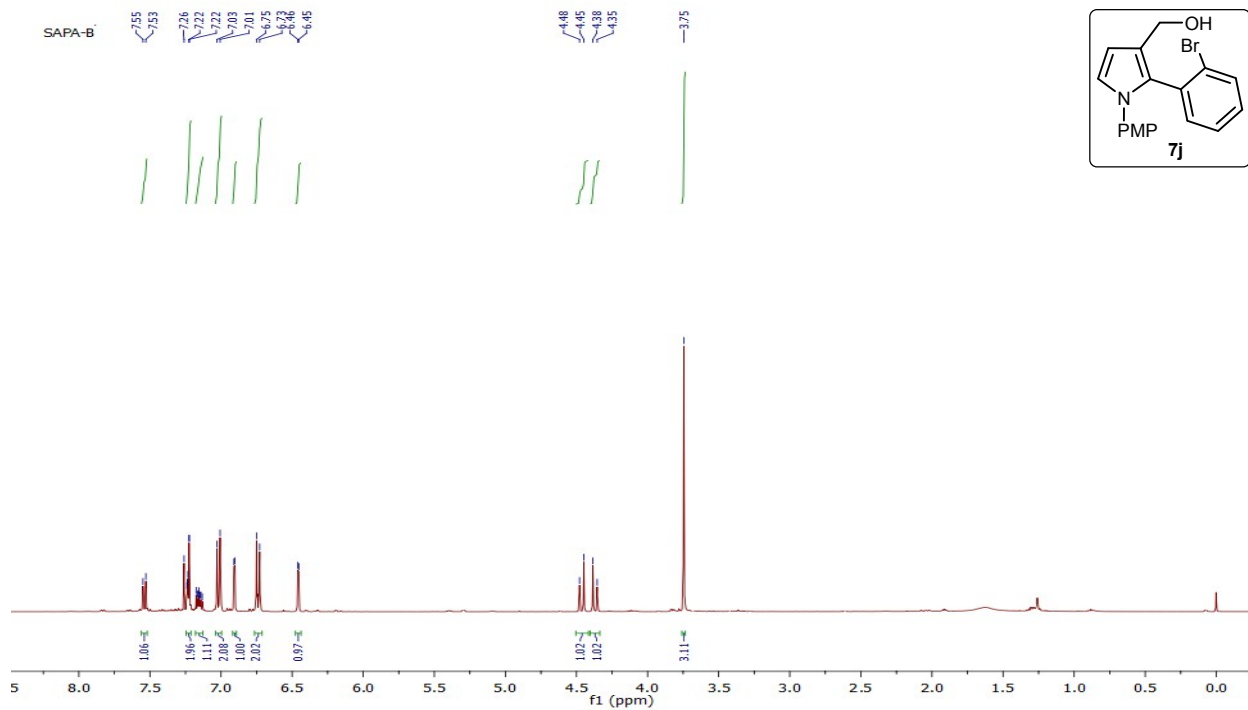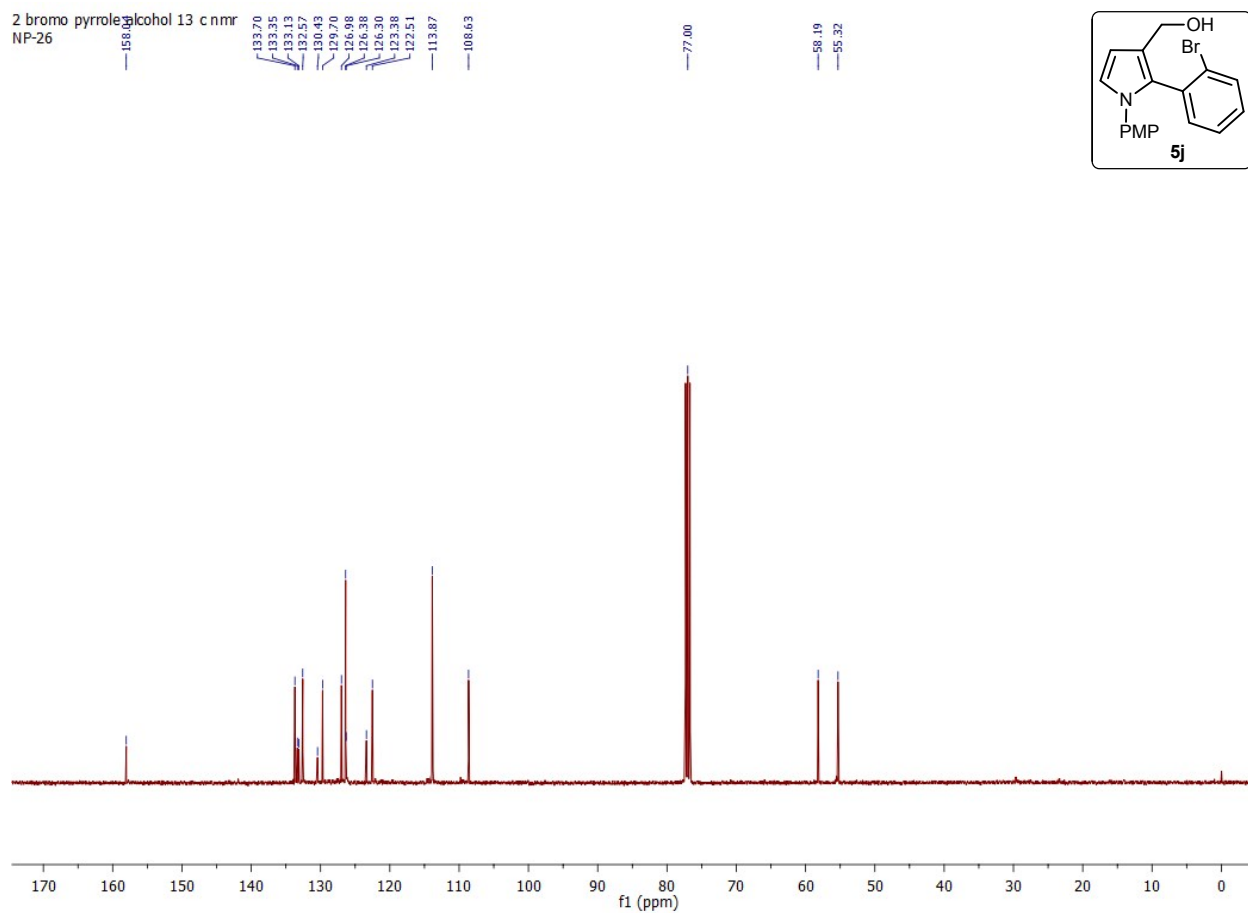



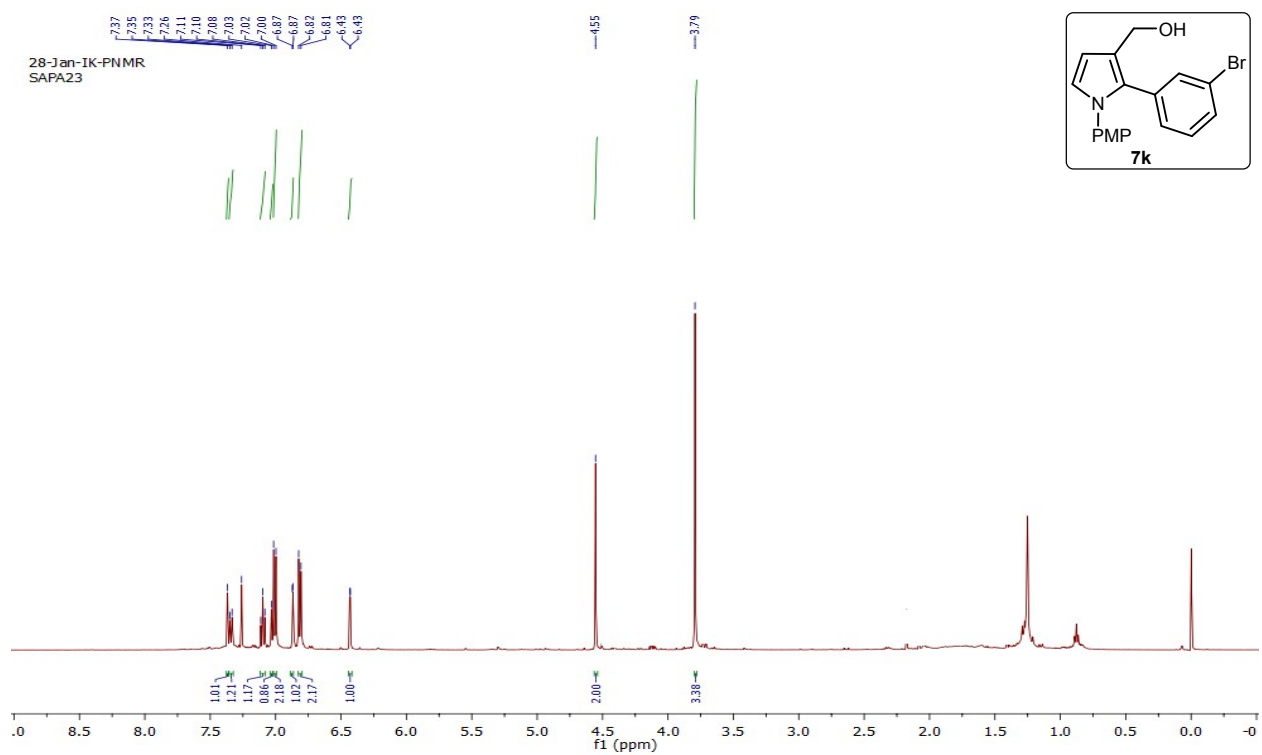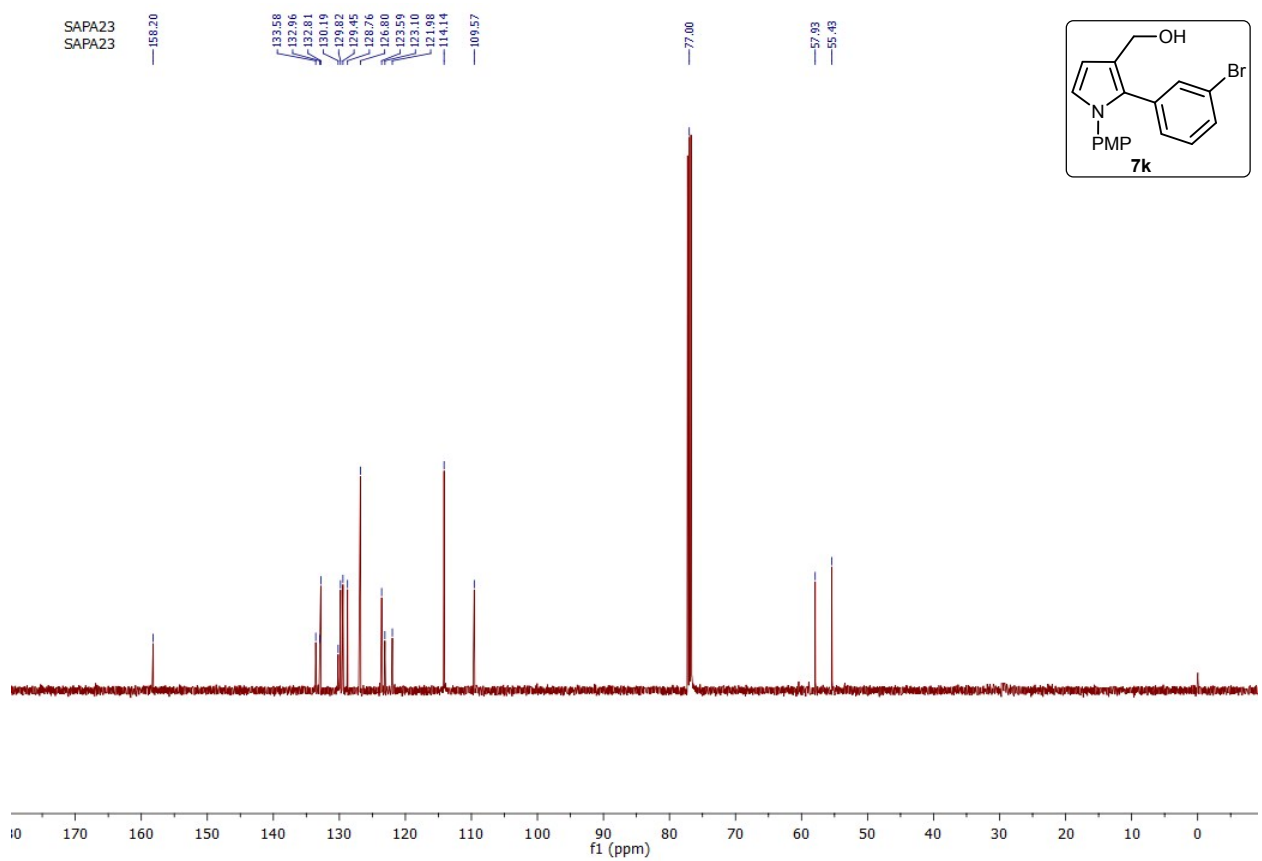

IK 9 OCT 2014  
SAPA-13

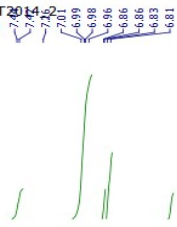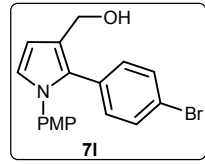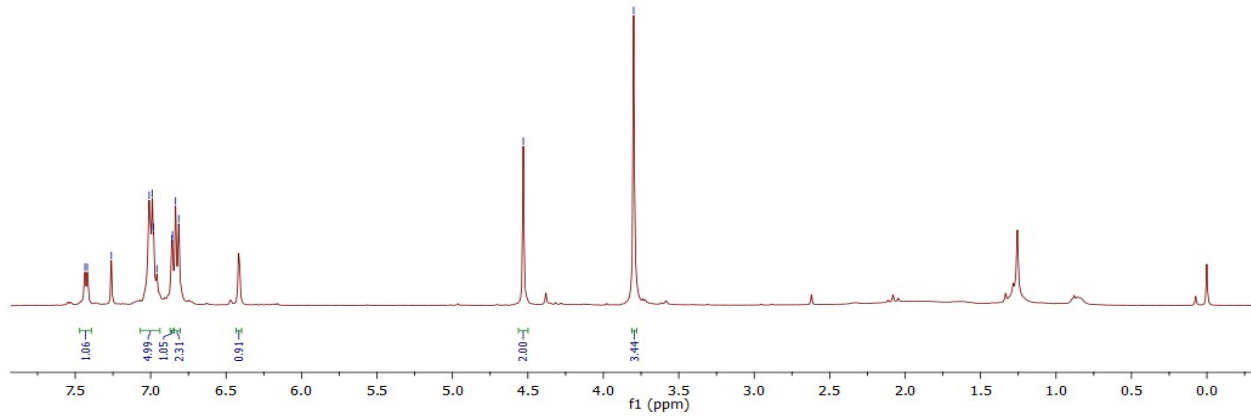

SAPA-13  
SAPA-13

158.37  
153.95  
134.91  
132.87  
130.79  
130.72  
128.51  
128.20  
126.91  
123.51  
123.09  
116.11  
115.89  
114.26  
109.56

77.00  
57.92  
55.46

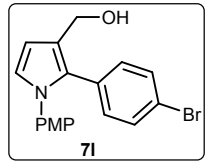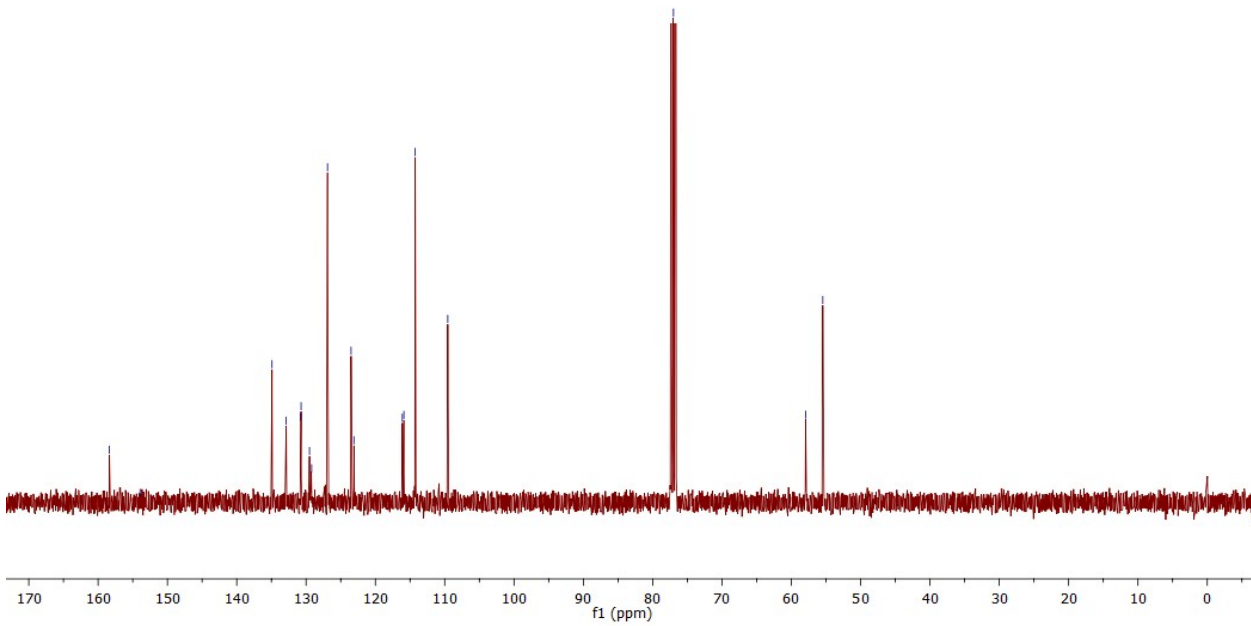

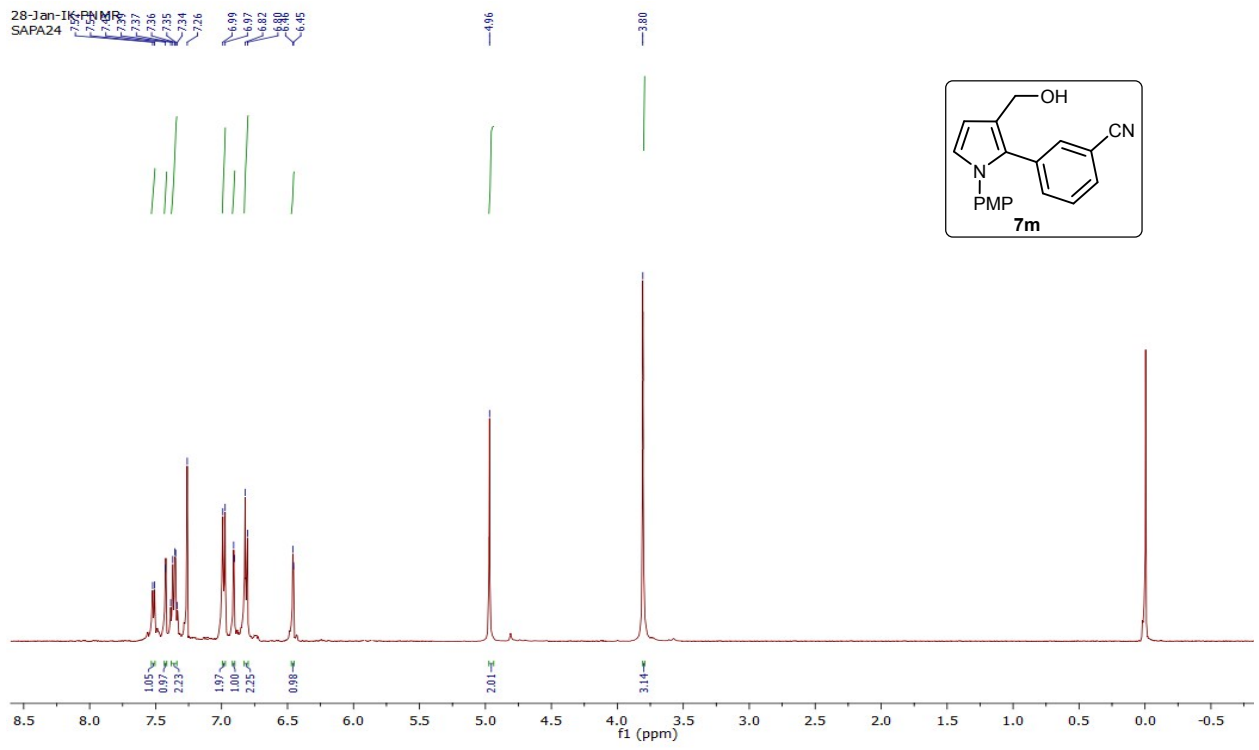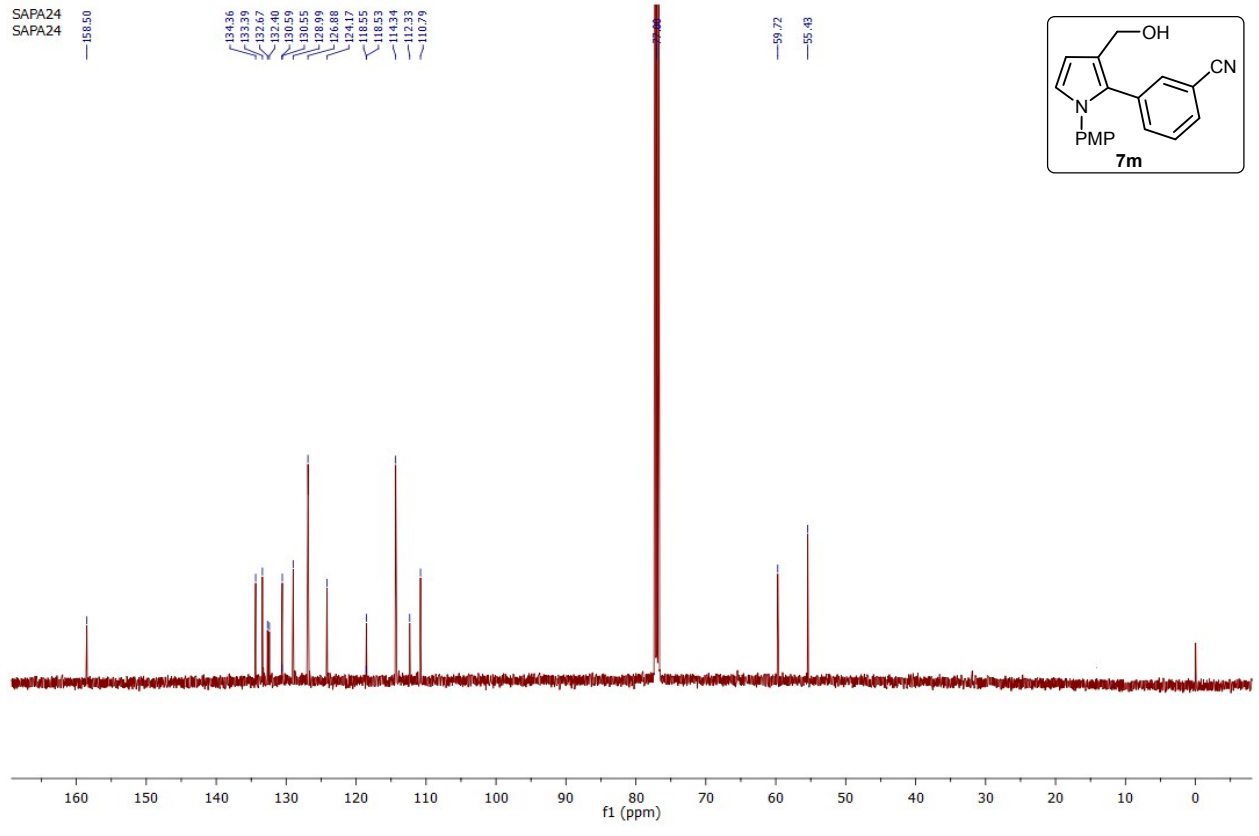

IK 9 OCT 2014  
SAPA-10

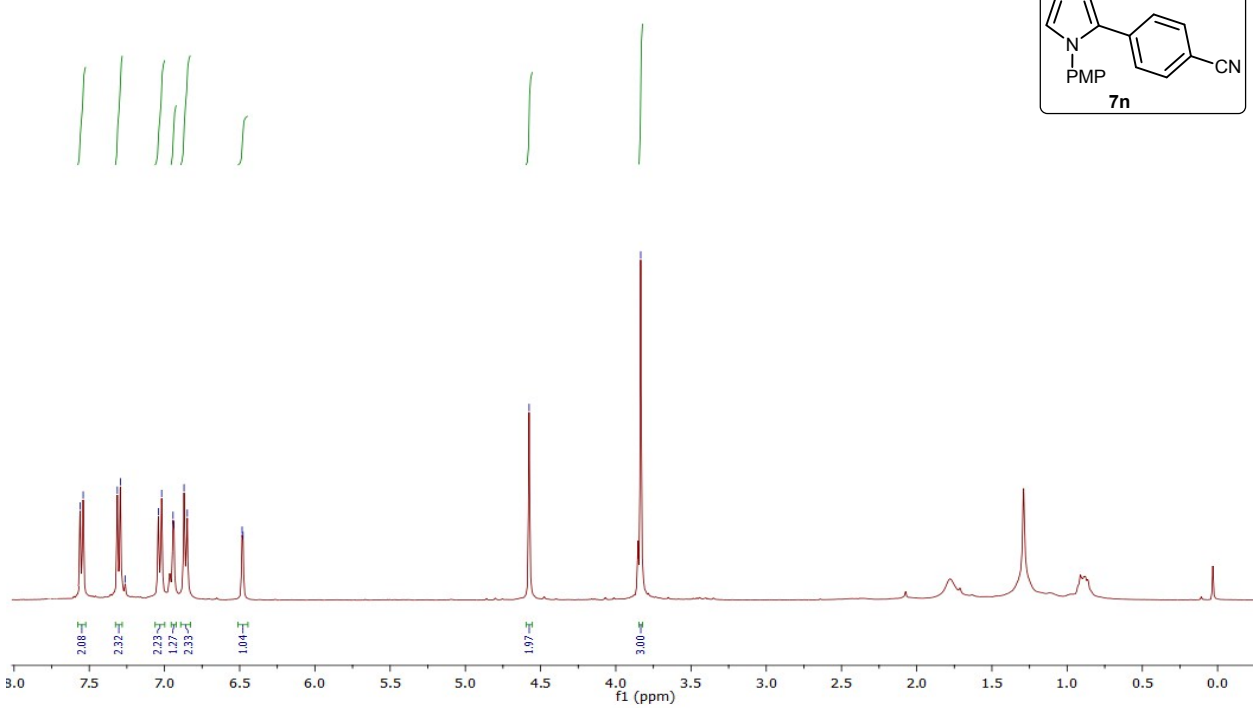

SAPA-10  
SAPA-10

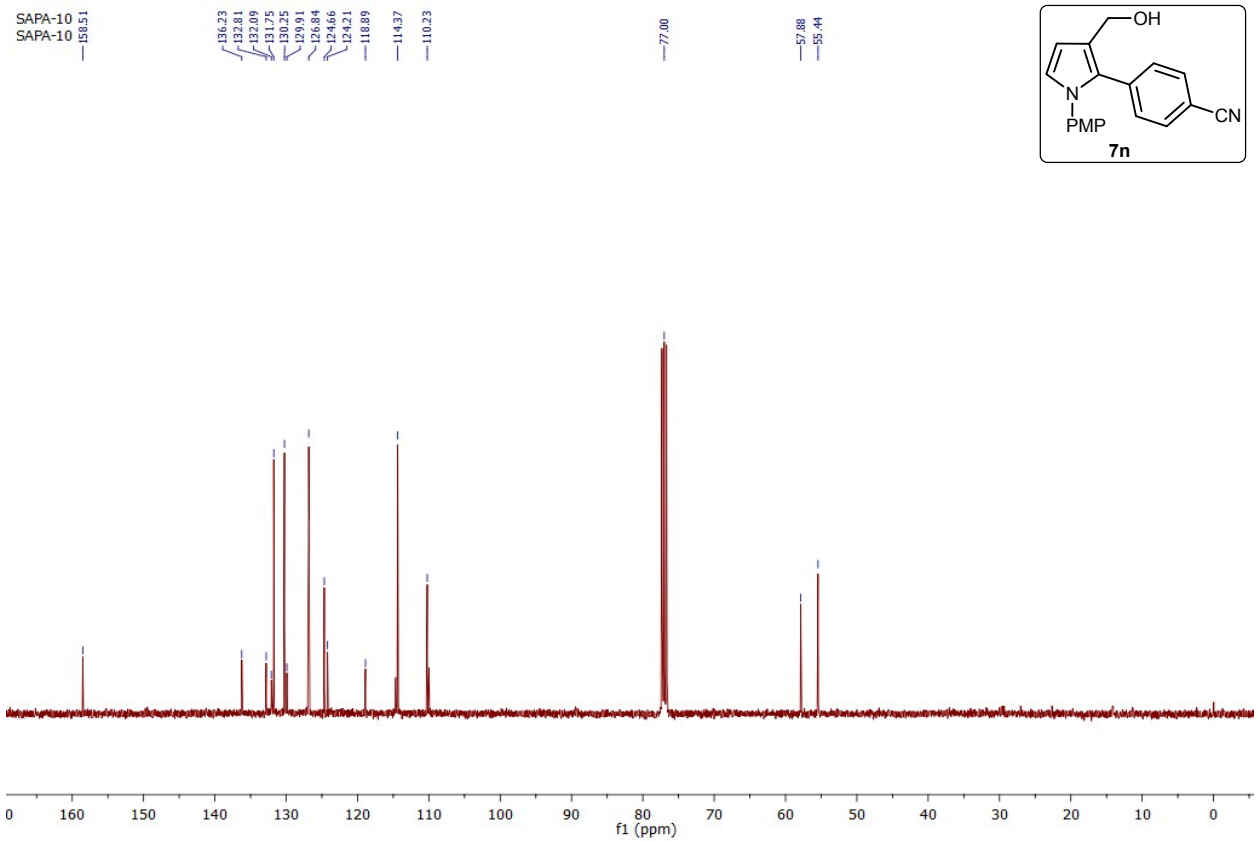

28-Jan-IK-PNMR  
SAPA22

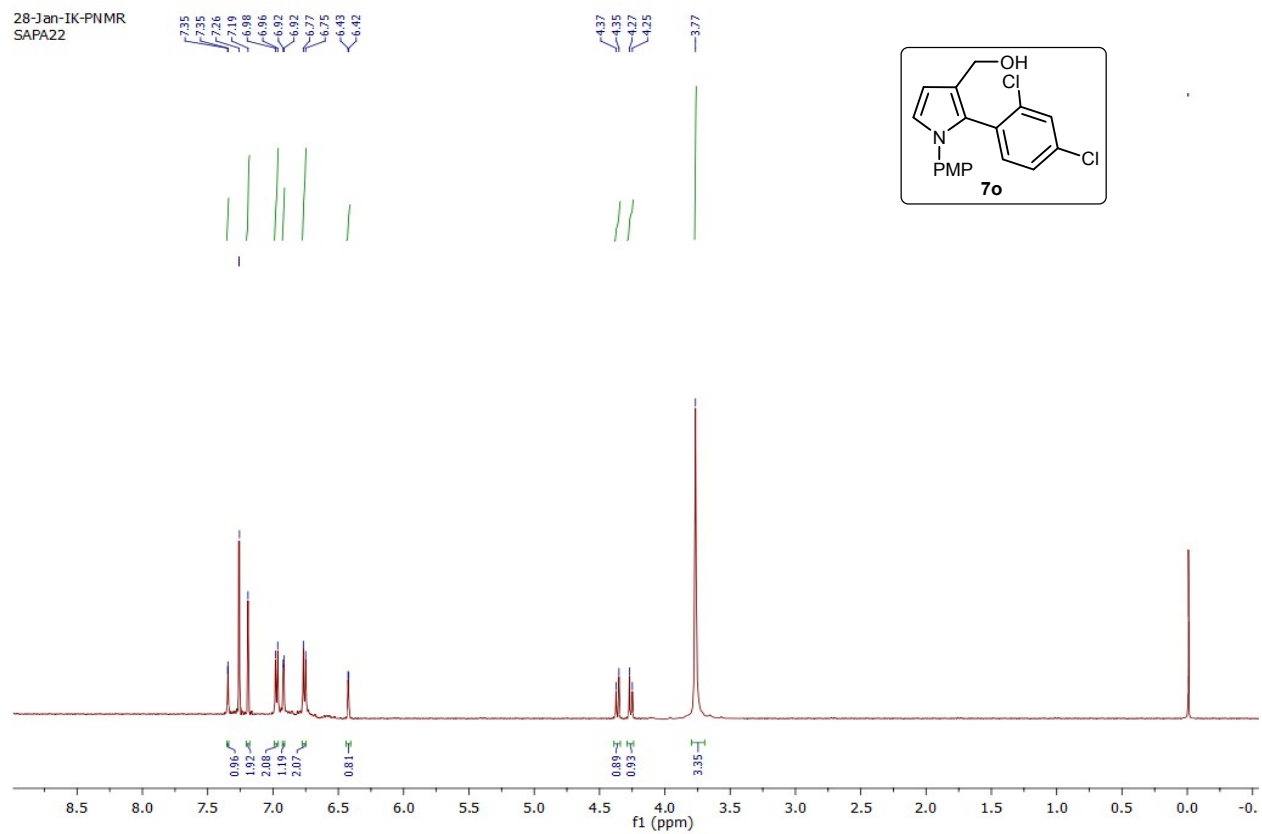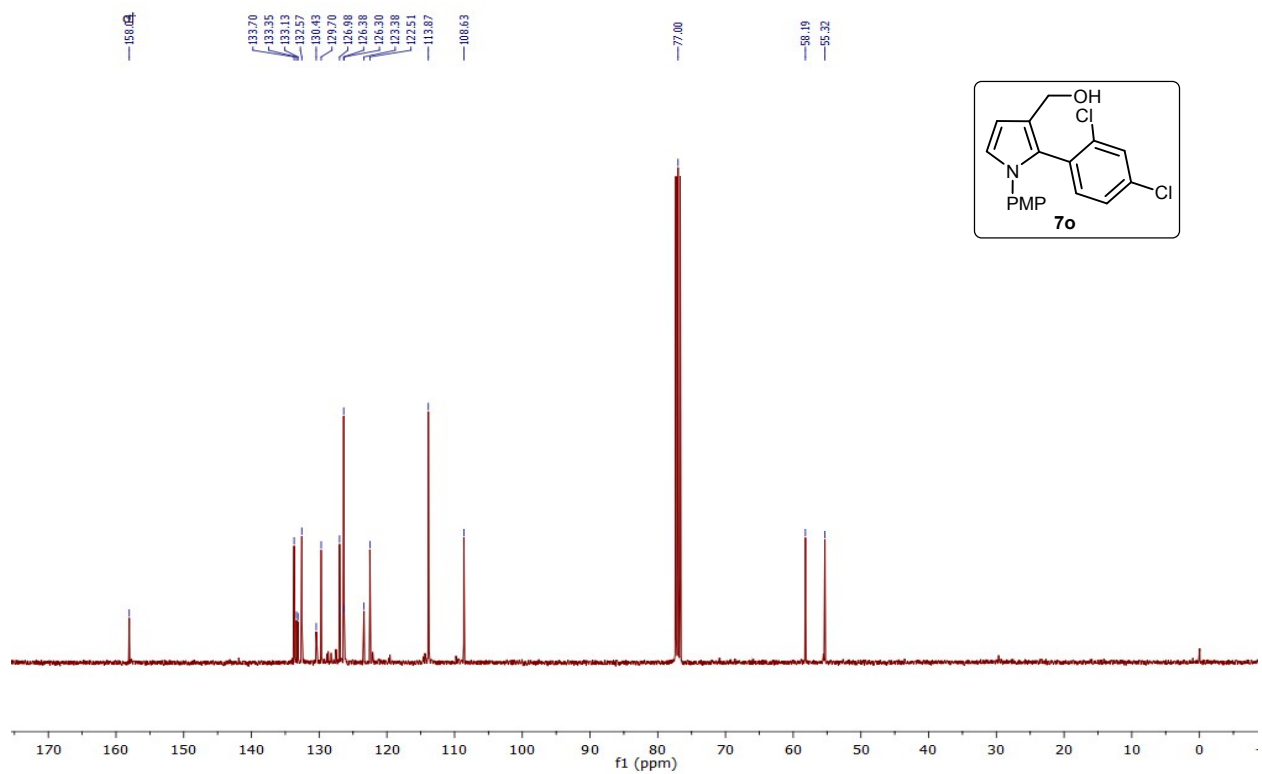

28-Jan-IK-PNMR  
SAPA19

7.33  
7.33  
7.30  
7.28  
7.02  
7.00  
6.89  
6.85  
6.42

4.54

3.80

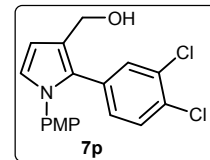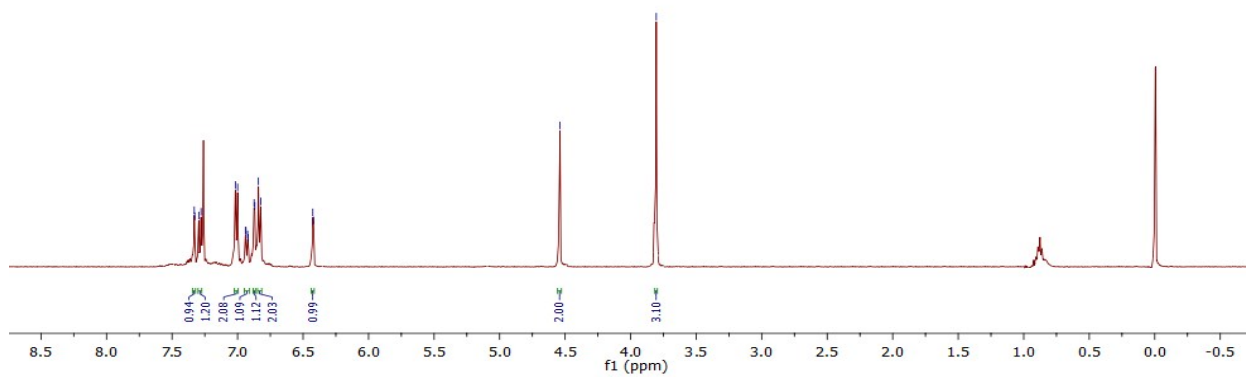

158.20

133.58  
132.96  
132.81  
130.19  
129.82  
128.76  
126.80  
123.59  
123.10  
121.98  
114.14  
109.57

77.00

57.93  
55.48

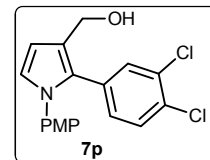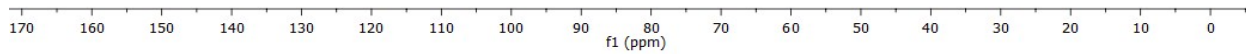

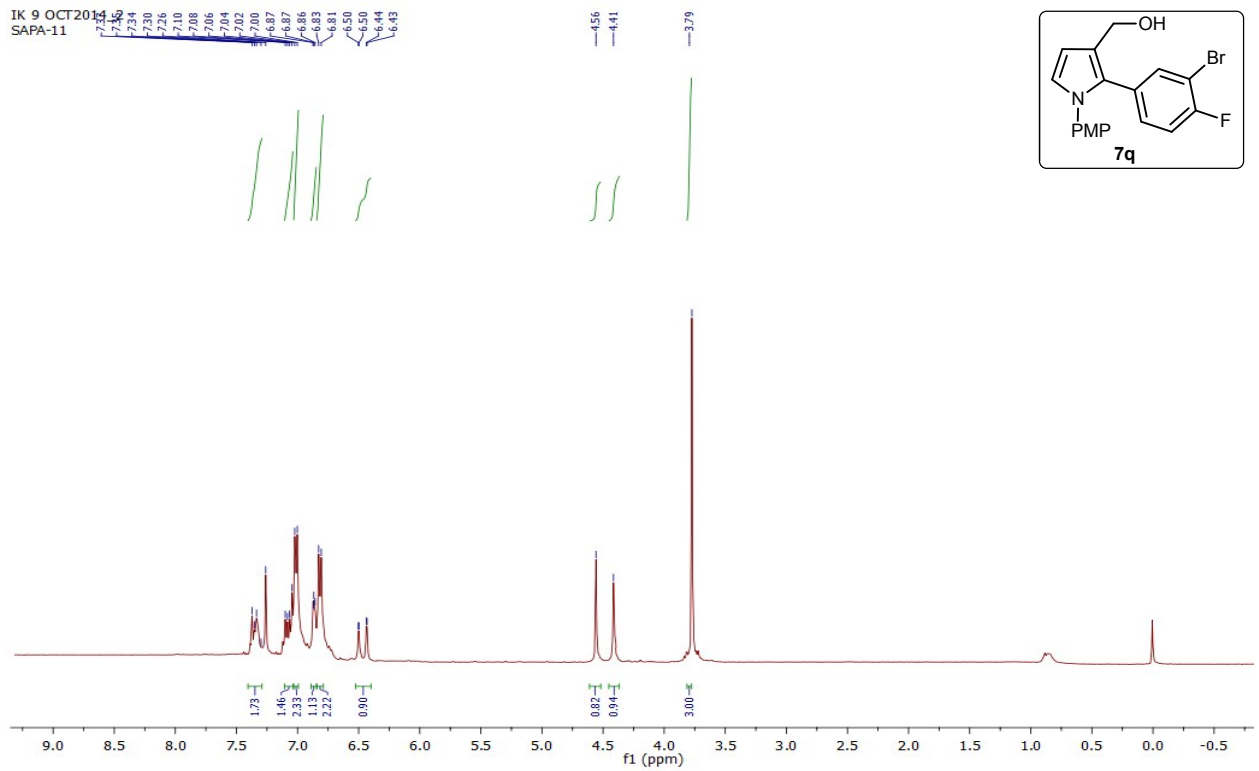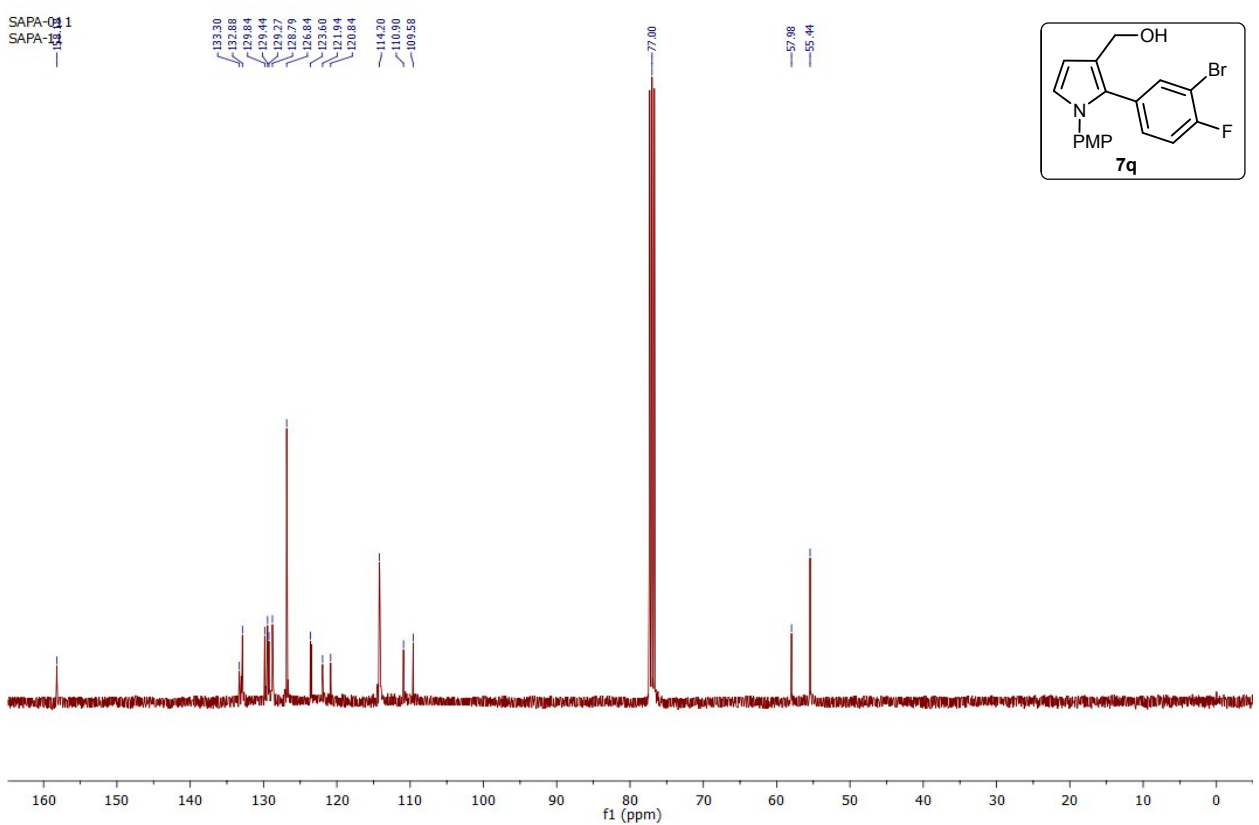

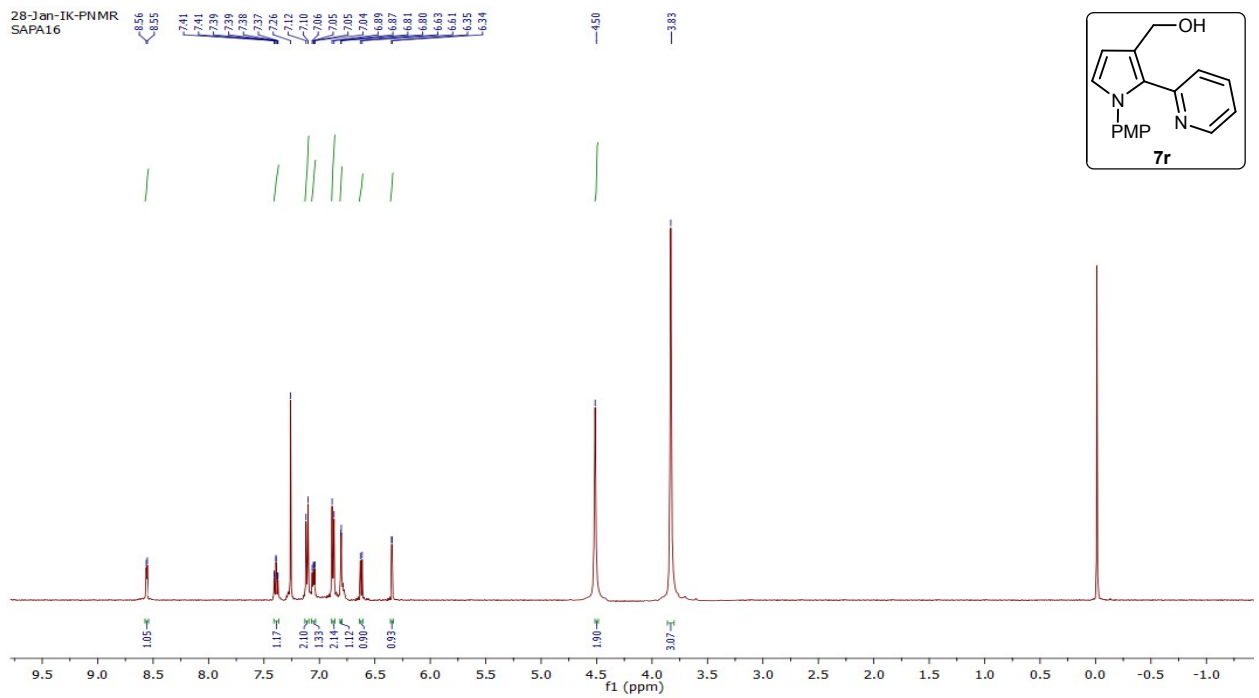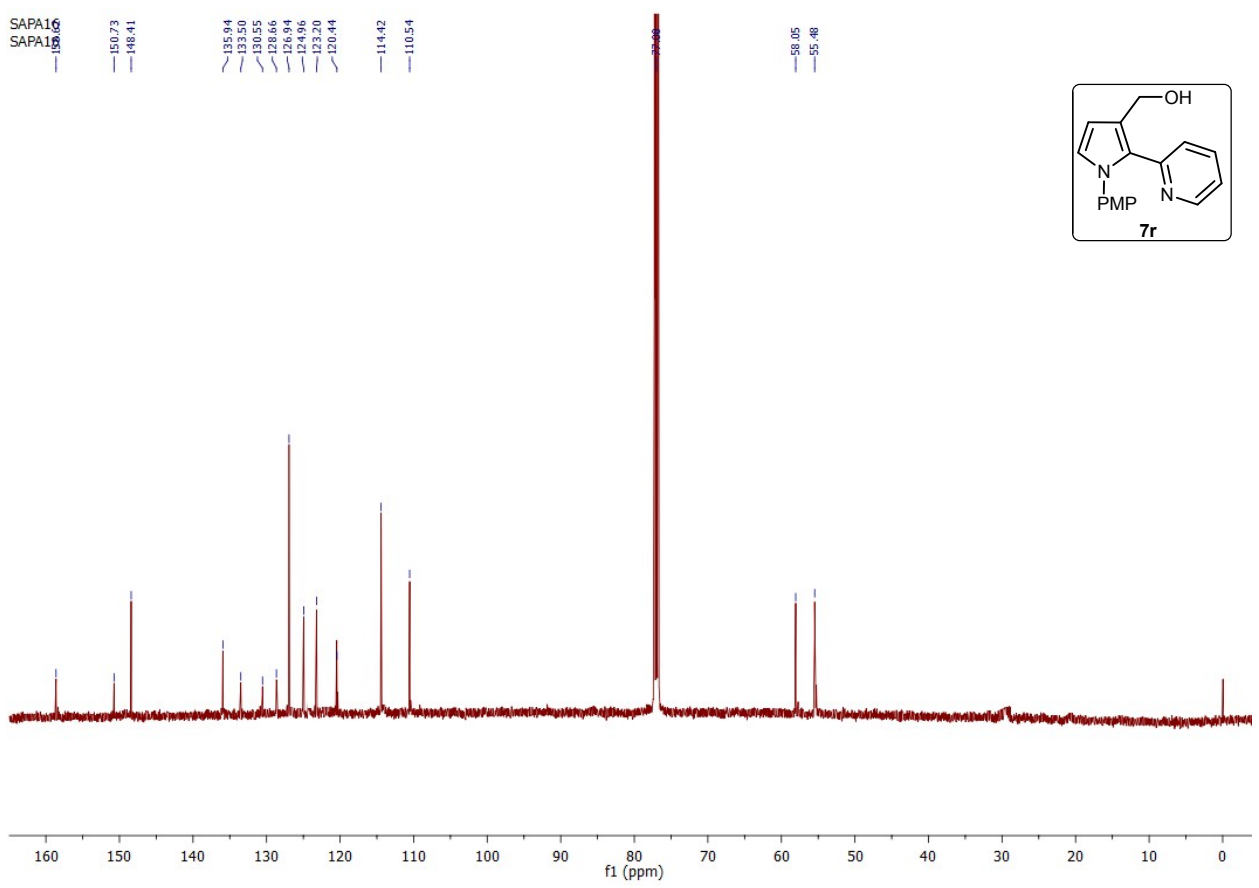



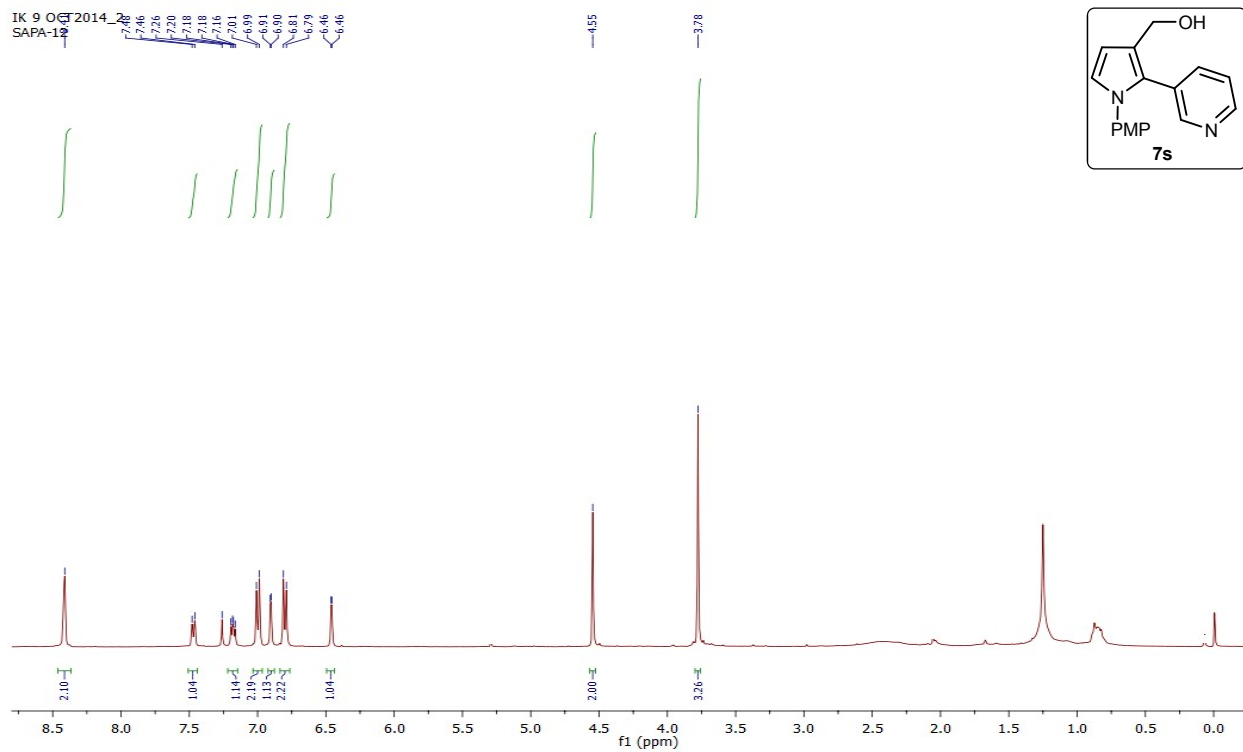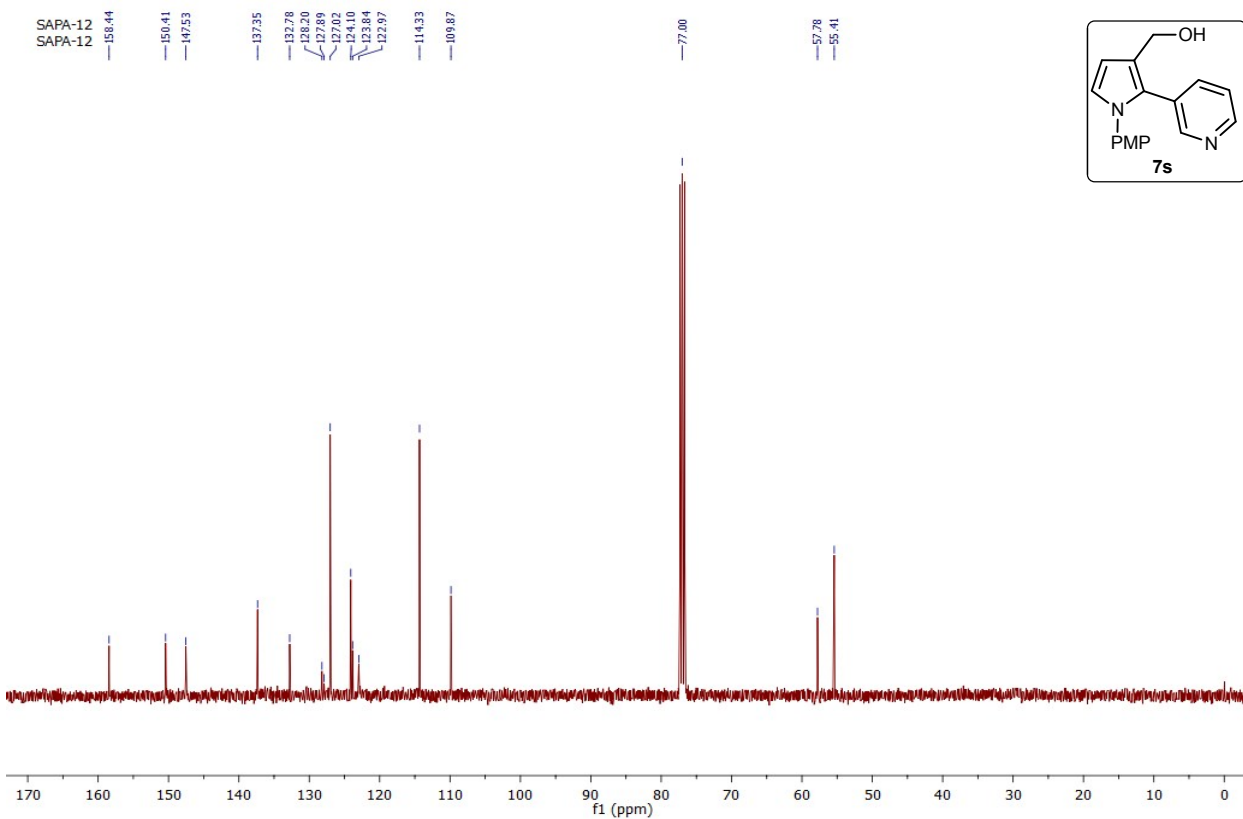

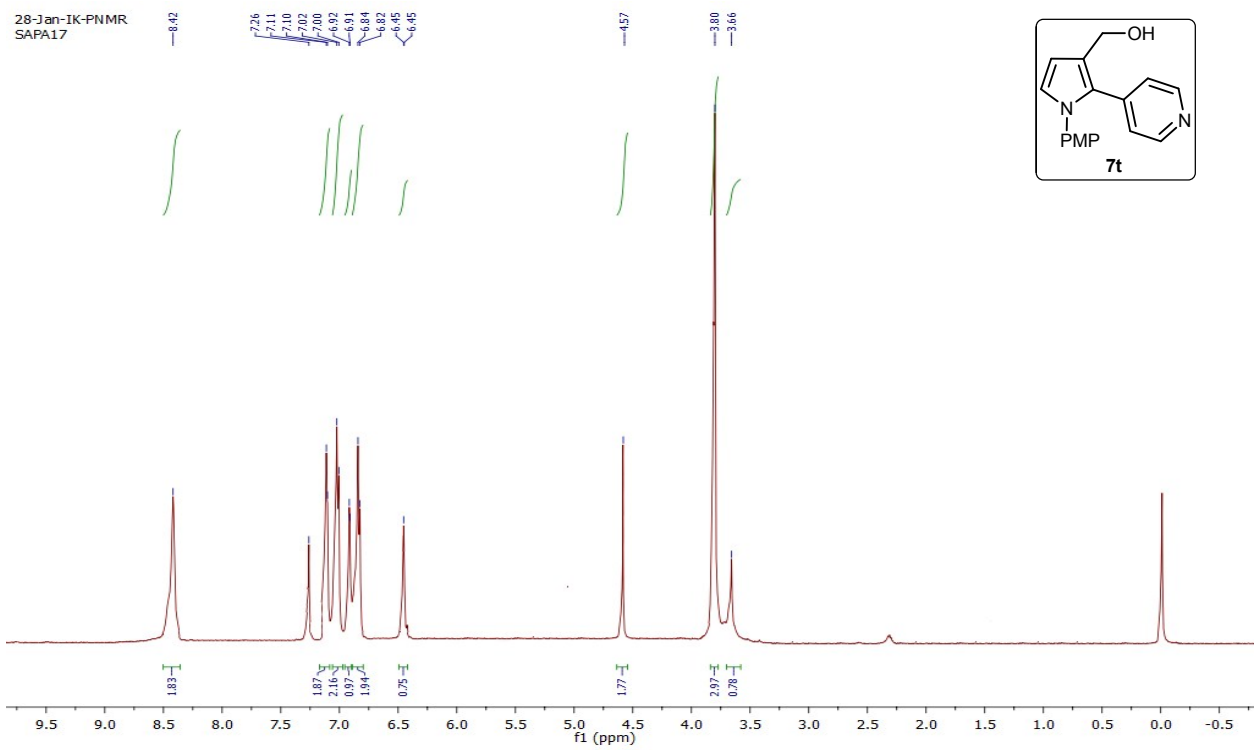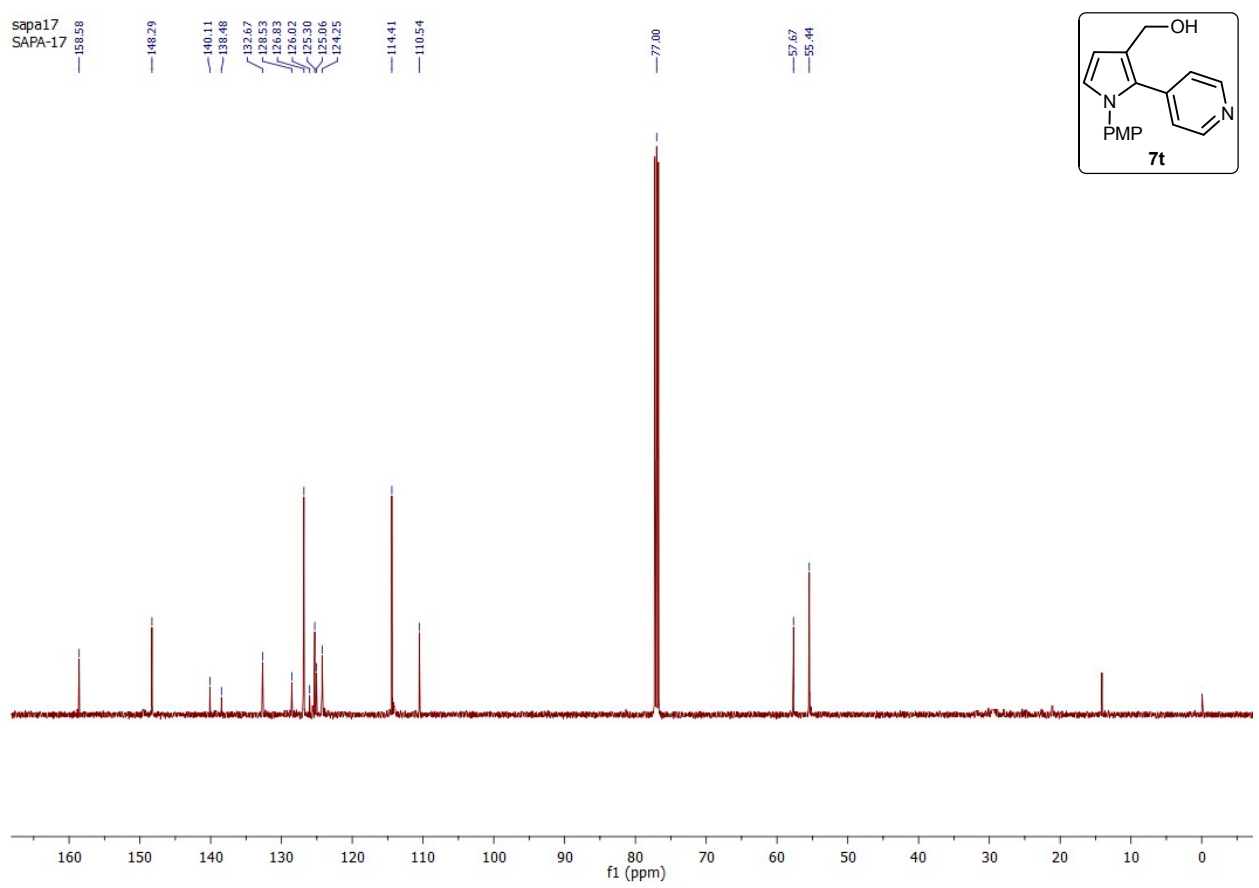

IK 9 OCT2014\_2  
SAPA-15

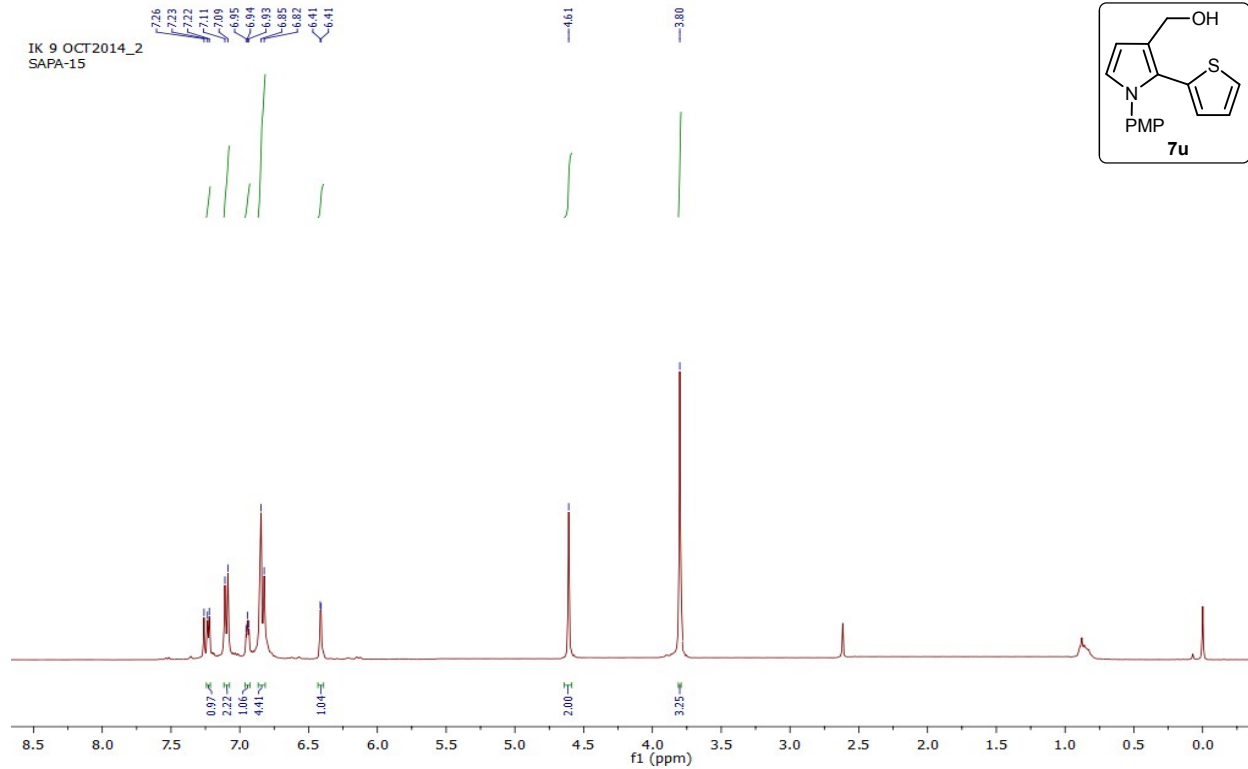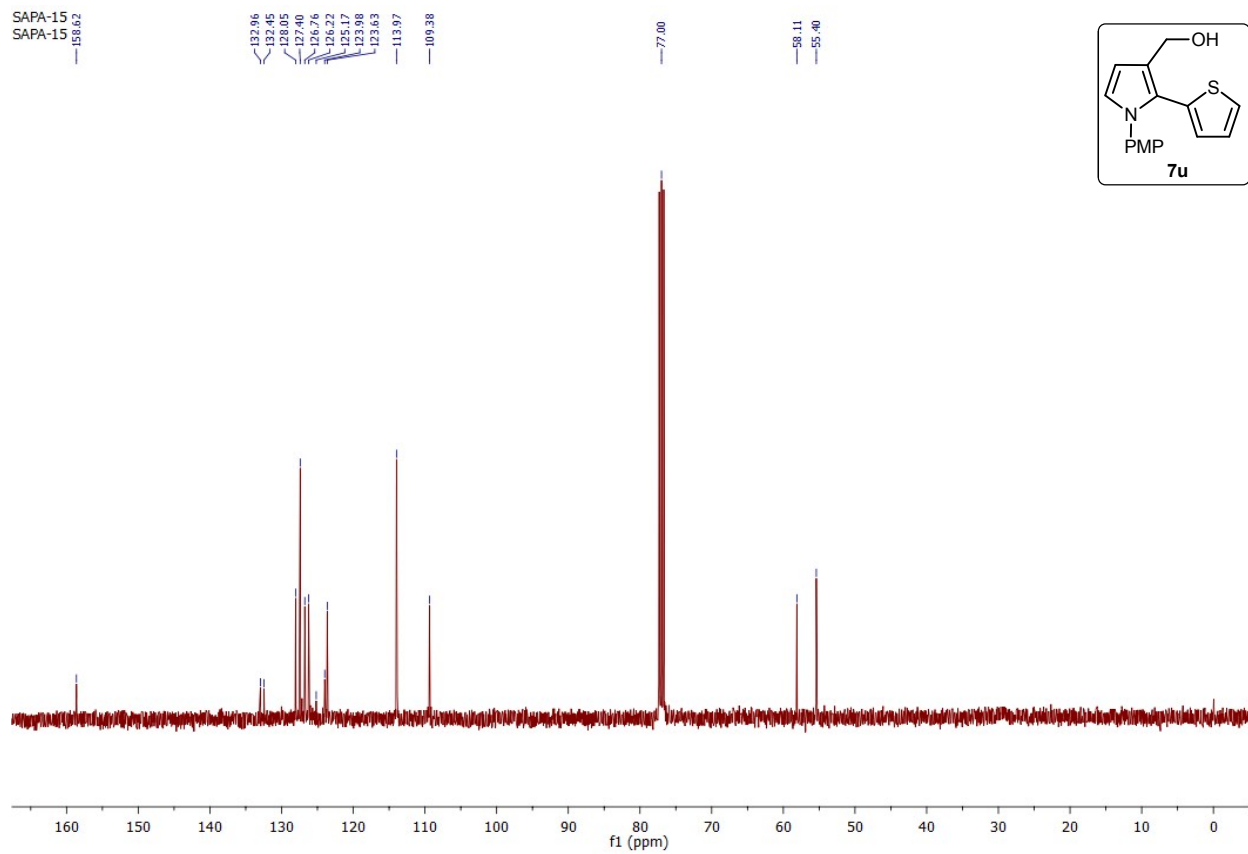

28-Jan-IK-PNMR  
SAPA18

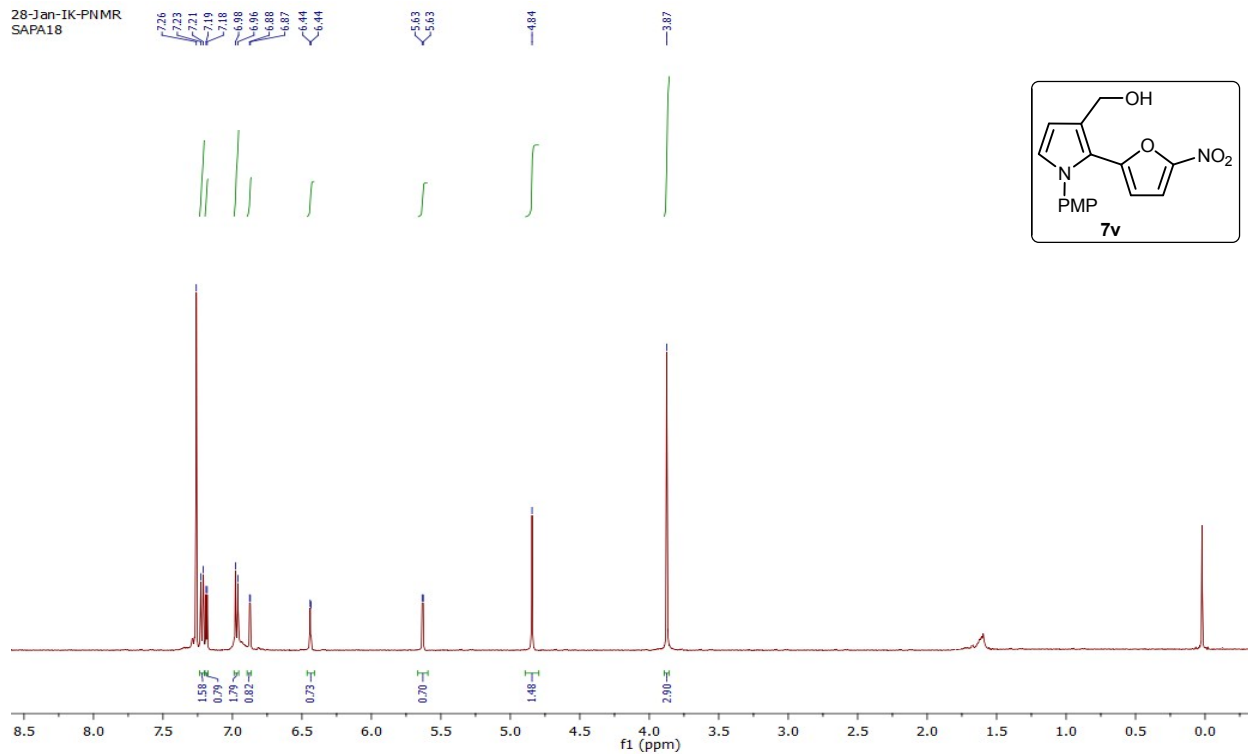

SAPA18  
SAPA18

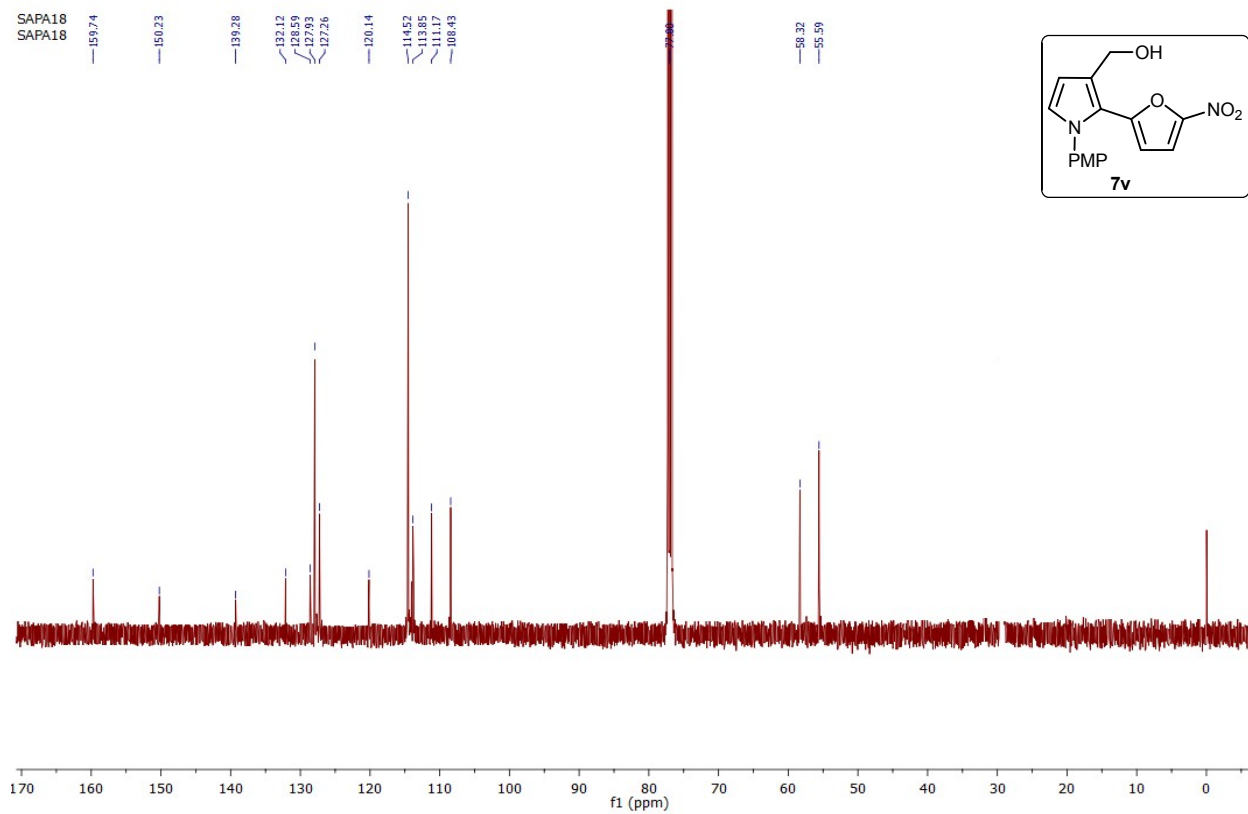

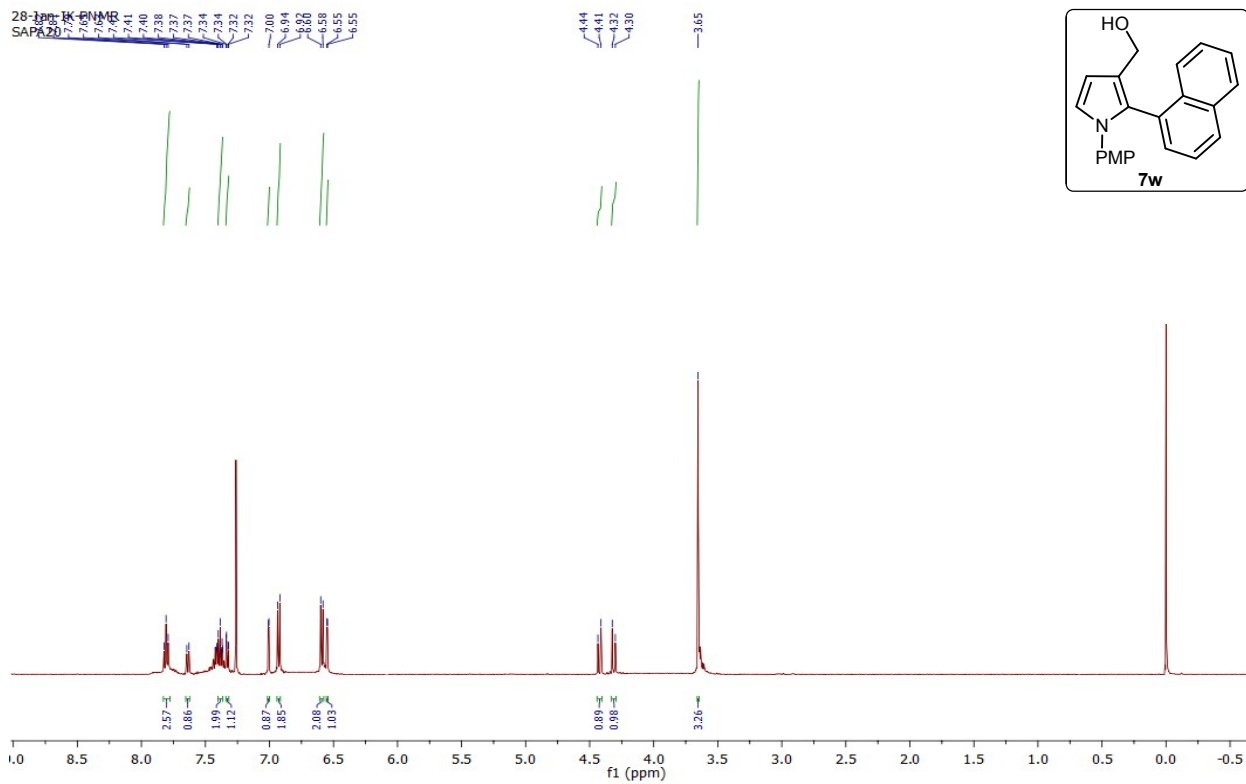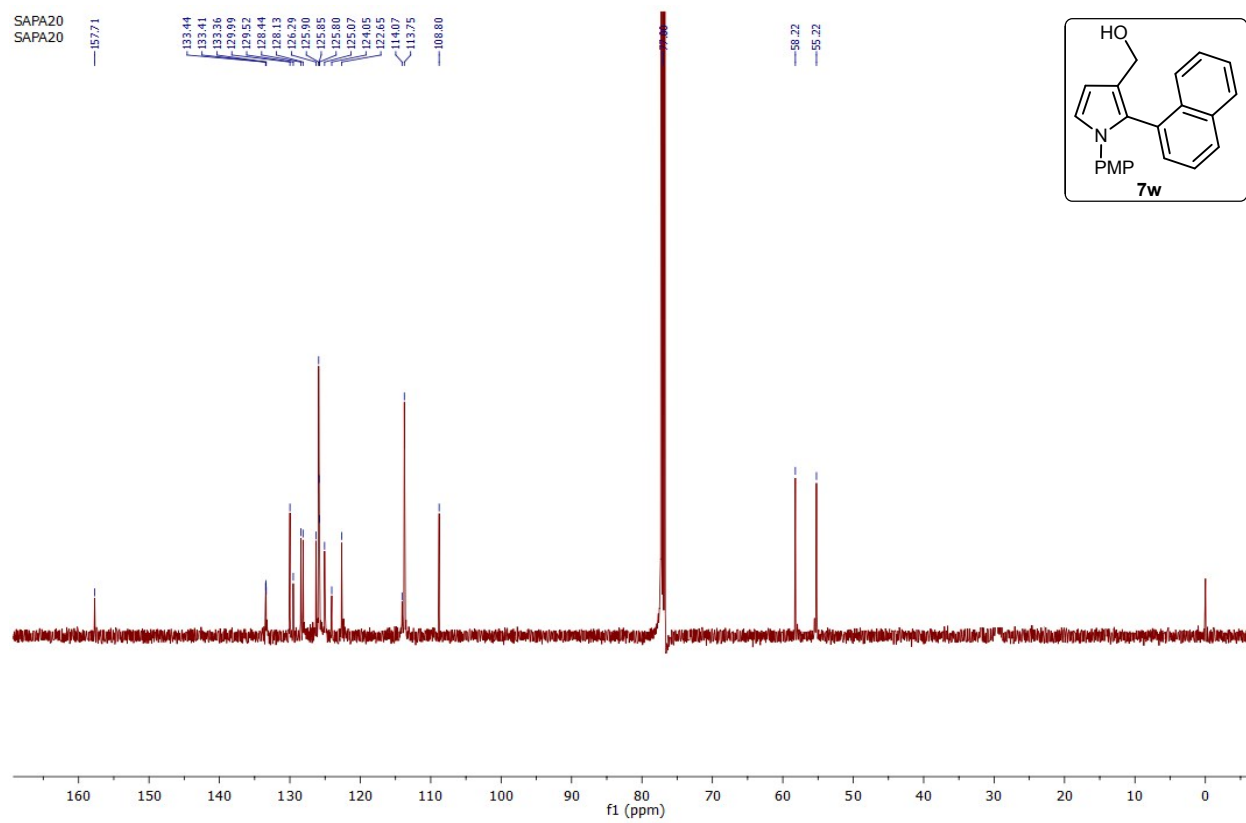

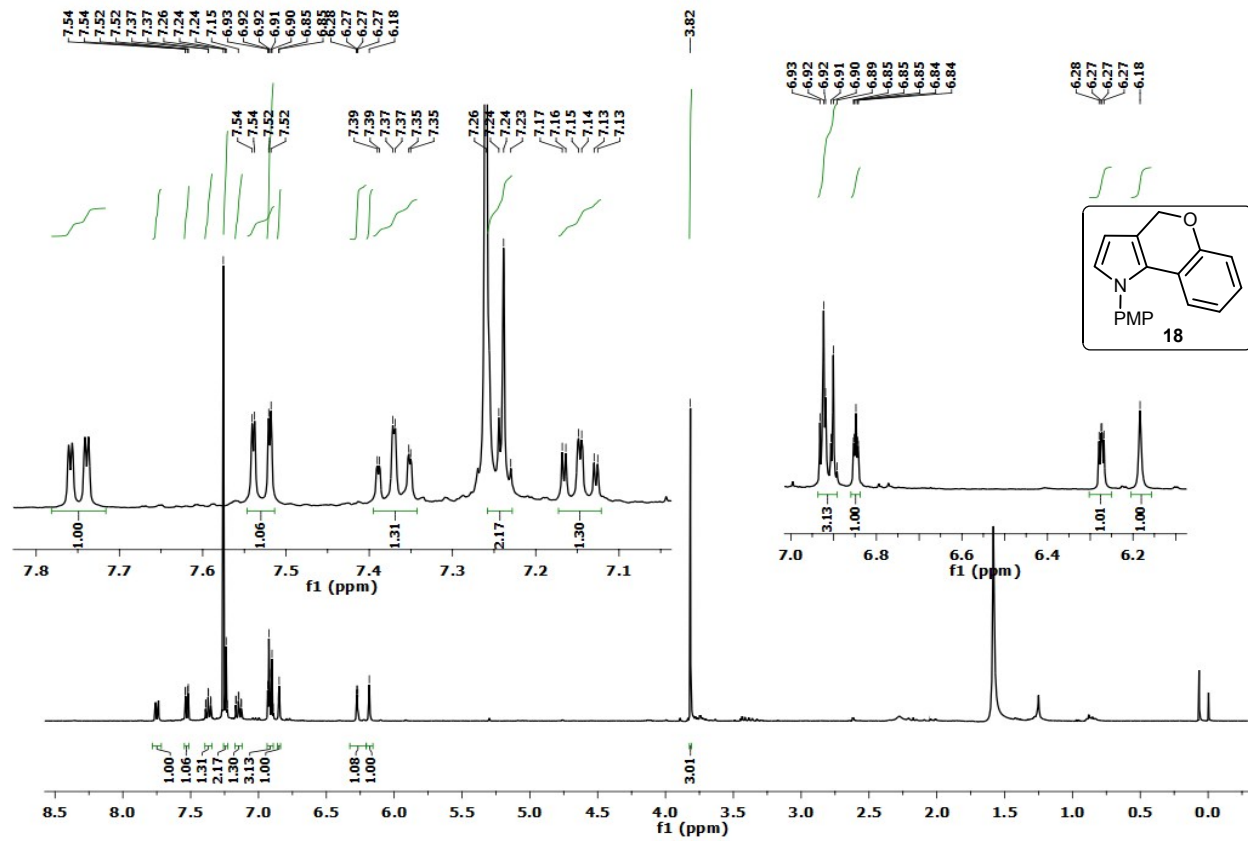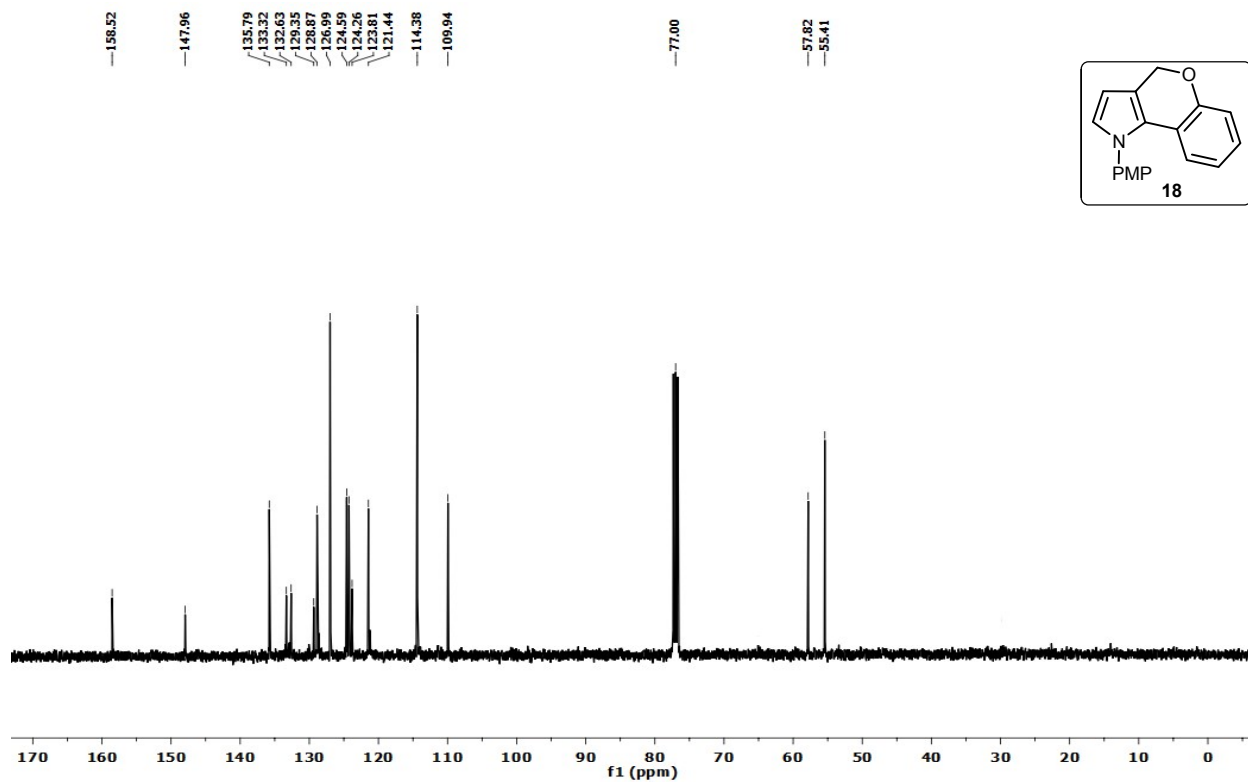

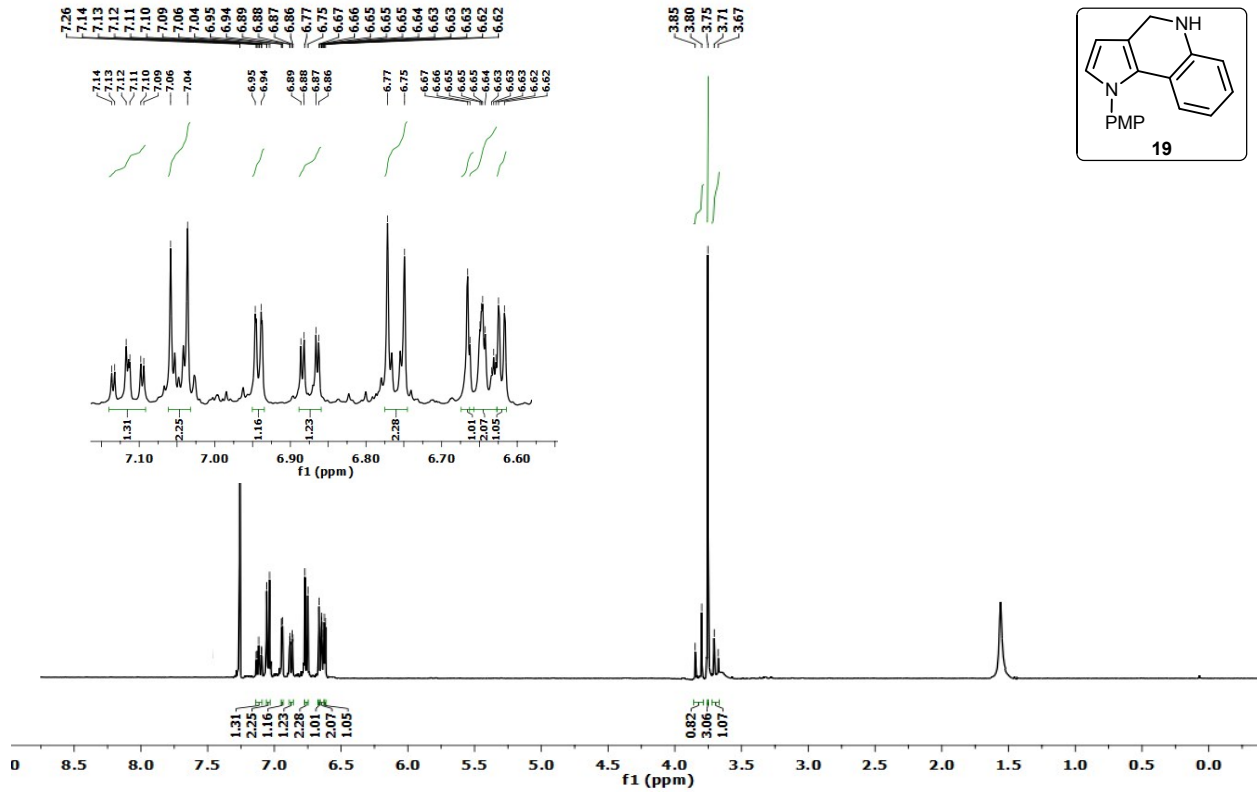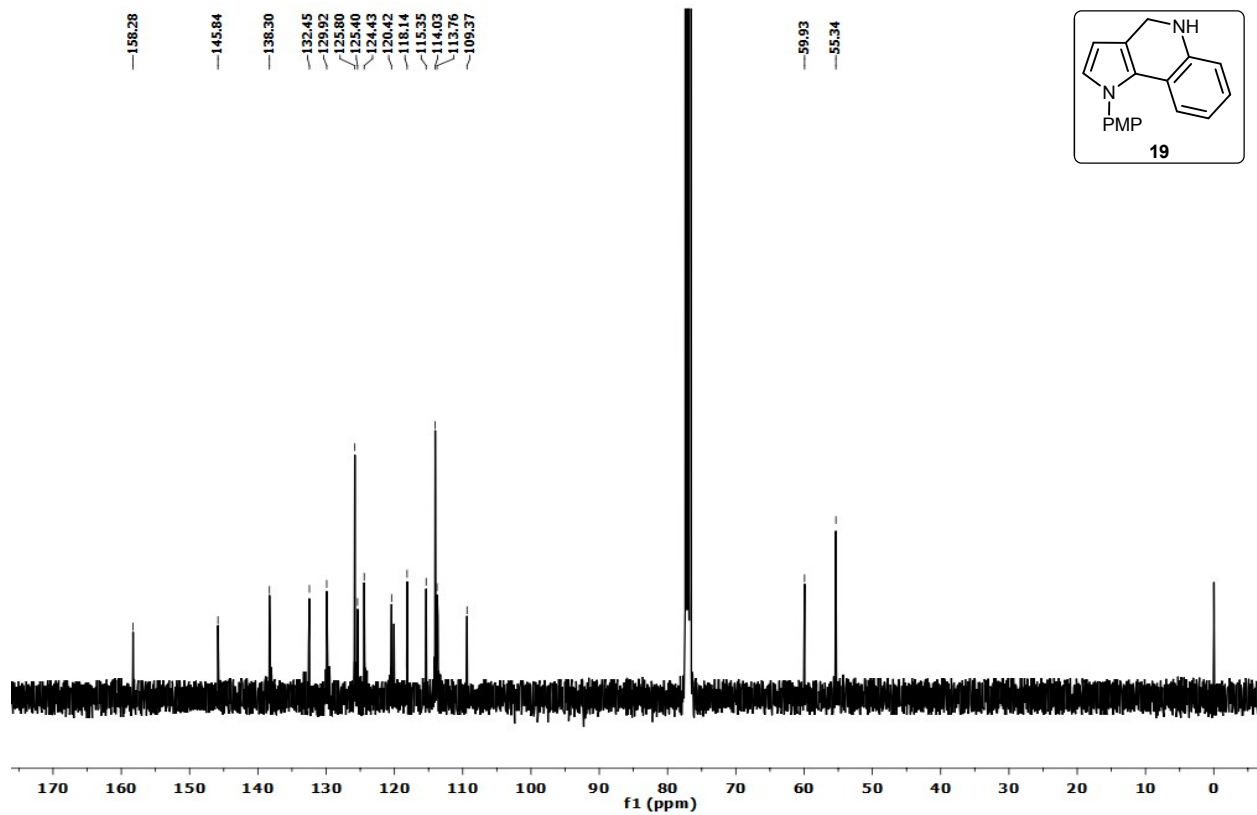

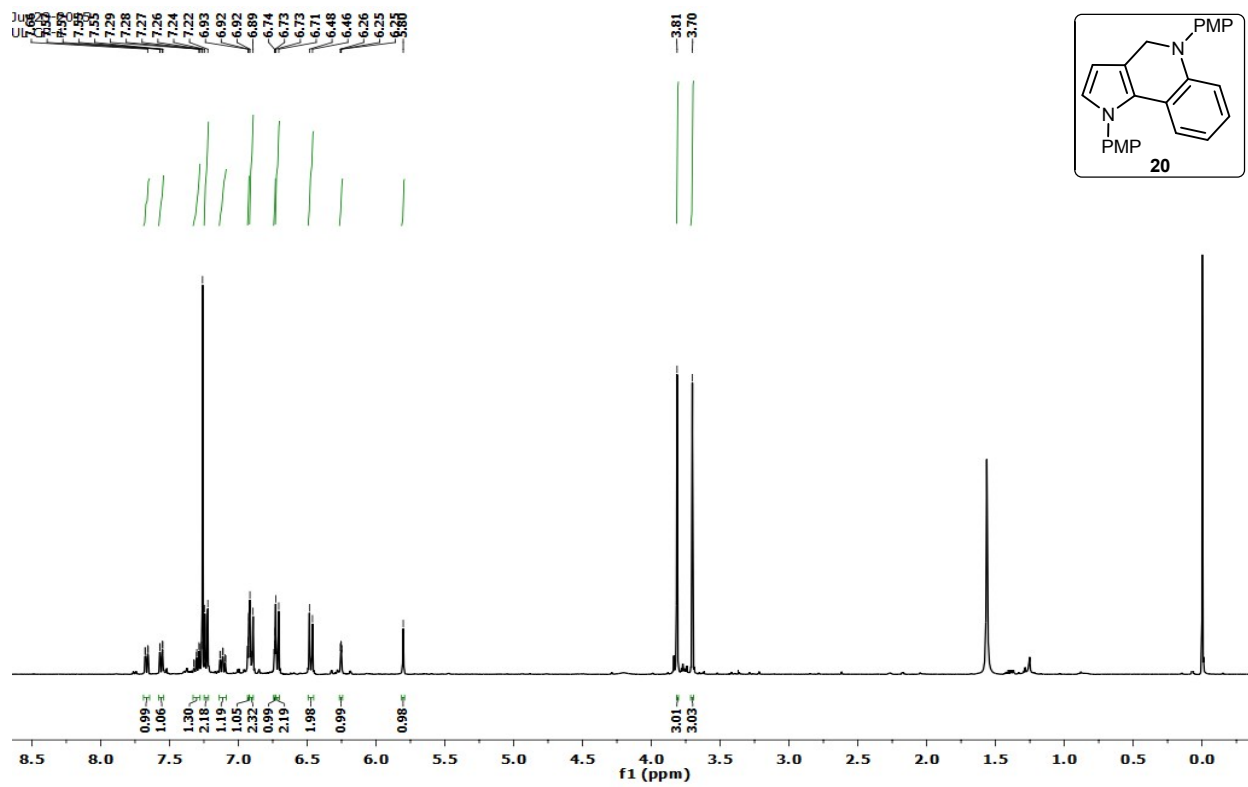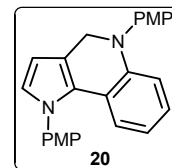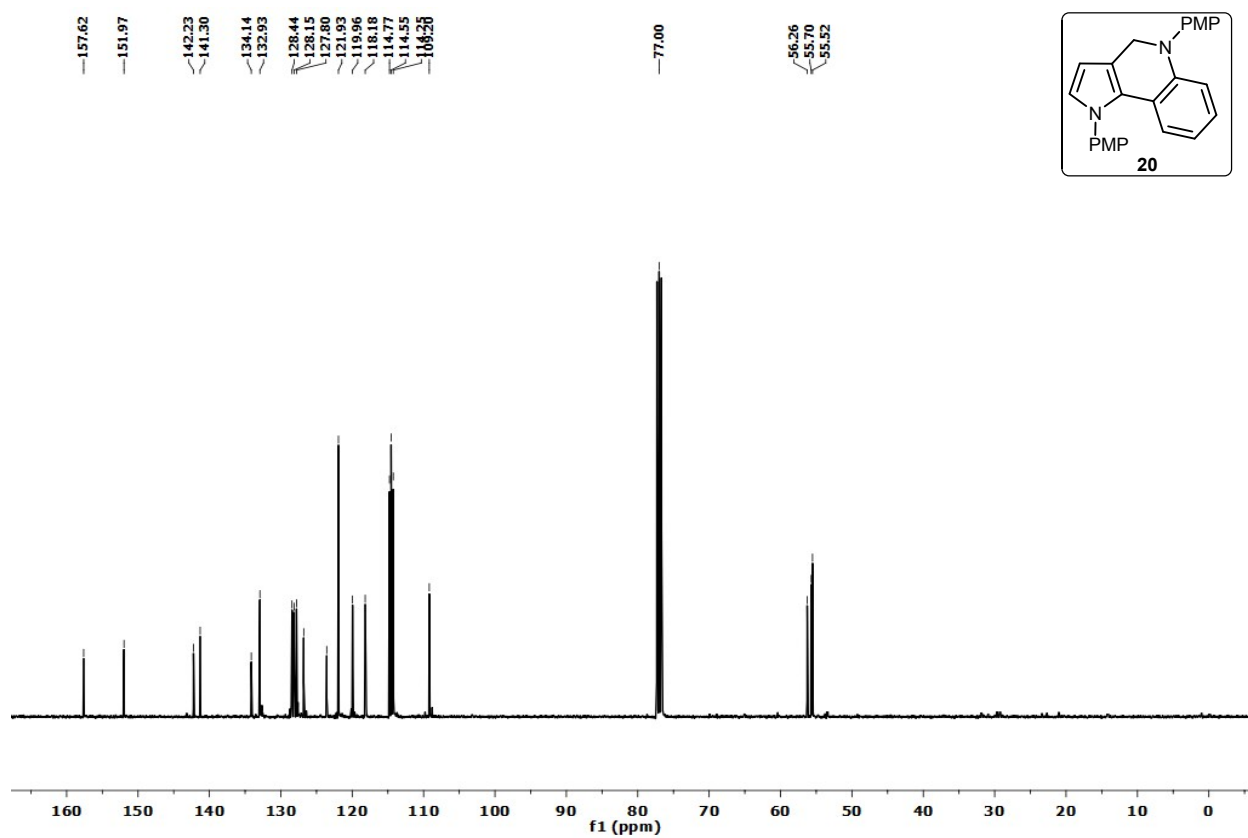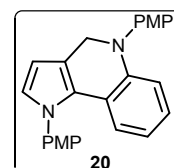



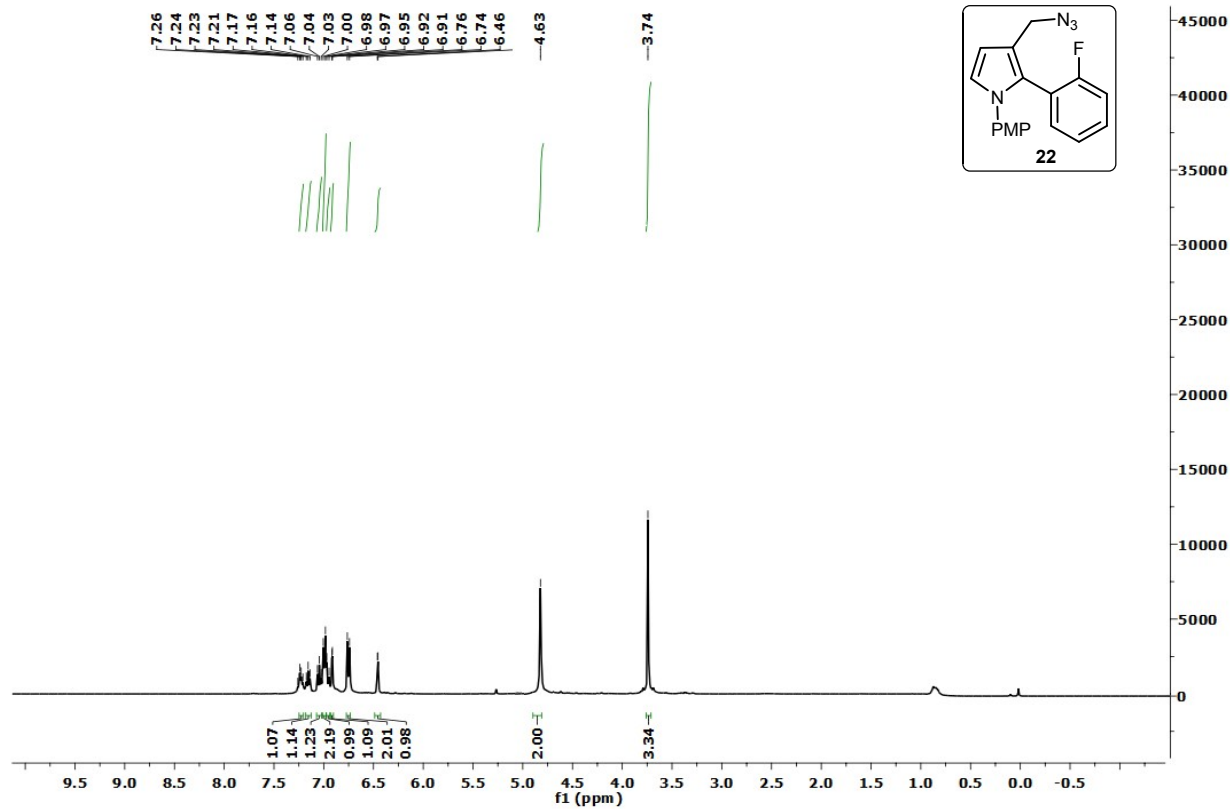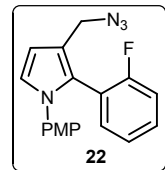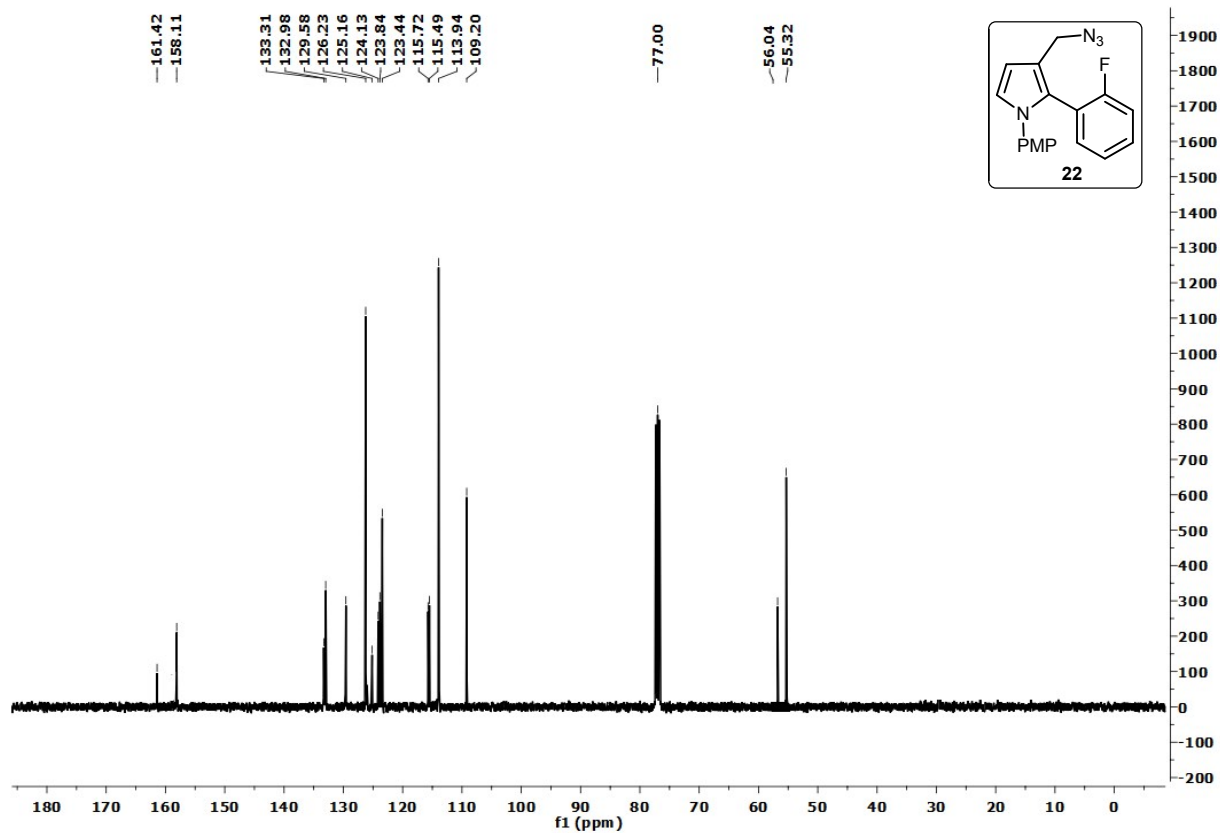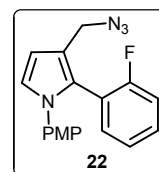

Supplement: c6ra06831f1.pdf [file c6ra06831f1.pdf]
